# Supplementary material for: IL-17 Induces an Expanded Range of Downstream Genes in Reconstituted Human Epidermis Model
Source: PLoS One. 2014 Feb 28;9(2):e90284. doi: 10.1371/journal.pone.0090284 (PMC3938679; doi:10.1371/journal.pone.0090284)
Supplement: Table S1 — Differentially expressed genes in IL-17-treated keratinocytes and/or RHE and/or fibroblasts. (PDF) [file pone.0090284.s007.pdf]

Table S1: Differentially expressed genes in IL-17-treated keratinocytes and/or RHE and/or Fibroblasts

| SYMBOL   | Description                                                                        | FCH_IL17_RHE | gFCH_IL17_RHE | p_gFCH_IL17_RHE | FDR_gFCH_IL17_RHE | Status_IL17_RHE | FCH_IL17_KC | gFCH_IL17_KC | IL17_KC | FDR_IL17_KC | Status_IL17_KC | FCH_IL17_Fib | gFCH_IL17_Fib | Status_IL17_Fib |
|----------|------------------------------------------------------------------------------------|--------------|---------------|-----------------|-------------------|-----------------|-------------|--------------|---------|-------------|----------------|--------------|---------------|-----------------|
| ZC3H12A  | zinc finger CCHC-type containing 12A                                               | 5.69         | 2.51          | 0.00            | 0.00              |                 | 19.07       | 4.25         | 0.00    | 0.00        |                | 11.71        | 3.55          | 1               |
| IL1B     | interleukin 1, beta                                                                | 3.94         | 1.98          | 0.00            | 0.01              | 1               | 2.64        | 1.40         | 0.00    | 0.03        | 1              | 6.90         | 2.79          | 1               |
| IL1B     | interleukin 1, beta                                                                | 3.89         | 1.96          | 0.00            | 0.04              | 1               | 2.73        | 1.45         | 0.00    | 0.01        | 1              | 6.42         | 2.68          | 1               |
| SPRR2C   | small proline-rich protein 2C (keratins)                                           | 27.07        | 4.76          | 0.00            | 0.00              | 1               | 19.10       | 4.26         | 0.00    | 0.00        | 1              | NA           | NA            | 0               |
| DEFB4A   | defensin, beta-4a                                                                  | 24.37        | 4.61          | 0.00            | 0.01              | 1               | 238.55      | 7.90         | 0.00    | 0.00        | 1              | NA           | NA            | 0               |
| IL1F9    | interleukin 1 family, member 9                                                     | 16.37        | 4.03          | 0.00            | 0.00              | 1               | 15.08       | 3.91         | 0.00    | 0.00        | 1              | NA           | NA            | 0               |
| SERPINB4 | serpin protease inhibitor, cluster B (endoplasmic) member 4                        | 7.03         | 2.83          | 0.00            | 0.00              | 1               | 27.53       | 4.78         | 0.00    | 0.00        | 1              | NA           | NA            | 0               |
| S100A12  | S100 calcium binding protein A12                                                   | 4.85         | 2.28          | 0.00            | 0.01              | 1               | 30.71       | 4.94         | 0.00    | 0.02        | 1              | NA           | NA            | 0               |
| NDRG2    | NDRG2 family member 2                                                              | 2.86         | 1.51          | 0.00            | 0.03              | 1               | 5.53        | 2.47         | 0.00    | 0.03        | 1              | NA           | NA            | 0               |
| NA       | NA                                                                                 | 2.70         | 1.43          | 0.00            | 0.00              | 1               | 2.09        | 1.06         | 0.00    | 0.16        | 1              | NA           | NA            | 0               |
| SLC6A14  | solute carrier family 6 (sodium acid transporter), member 14                       | 2.29         | 1.19          | 0.00            | 0.07              | 1               | 8.98        | 3.17         | 0.00    | 0.01        | 1              | NA           | NA            | 0               |
| NOD2     | nucleotide binding oligomerization domain containing 2                             | 2.16         | 1.11          | 0.00            | 0.00              | 1               | 5.25        | 2.39         | 0.00    | 0.01        | 1              | NA           | NA            | 0               |
| NAV3     | neuronal sodium channel 3                                                          | 2.00         | 1.00          | 0.00            | 0.06              | 1               | 1.85        | 0.89         | 0.00    | 0.10        | 1              | NA           | NA            | 0               |
| SLC11A2  | solute carrier family 11 (cation-coupled divalent metal ion transporter), member 2 | 1.86         | 0.89          | 0.00            | 0.05              | 1               | 2.17        | 1.12         | 0.00    | 0.00        | 1              | NA           | NA            | 0               |
| ATP1B1   | ATPase, Na+/K+ transporting, beta 1 polypeptide                                    | 1.74         | 0.80          | 0.00            | 0.09              | 1               | 2.18        | 1.12         | 0.00    | 0.12        | 1              | NA           | NA            | 0               |
| CYBSR2   | cytochrome b5, subunit 2                                                           | 1.67         | 0.74          | 0.00            | 0.05              | 1               | 1.73        | 0.79         | 0.00    | 0.00        | 1              | NA           | NA            | 0               |
| CHAC1    | Chac1, cation transport regulator homolog 1 (B. cel)                               | 11.35        | 3.50          | 0.00            | 0.01              | 1               | 1.16        | 0.22         | 0.37    | 1.00        | 0              | 1.64         | 0.71          | 1               |
| LIF      | leukemia inhibitory factor (chondrocyte differentiation factor)                    | 3.47         | 1.79          | 0.00            | 0.02              | 1               | -1.01       | -0.01        | NA      | NA          | 0              | 2.85         | 1.51          | 1               |
| SLC04A1  | solute carrier family 4 (anion transporter family, member 4A1)                     | 2.98         | 1.58          | 0.00            | 0.01              | 1               | 1.68        | 0.74         | 0.09    | 1.00        | 0              | 1.74         | 0.80          | 1               |
| IL1A     | interleukin 1, alpha                                                               | 2.85         | 1.51          | 0.00            | 0.04              | 1               | 1.39        | 0.48         | 0.00    | 0.24        | 0              | 8.76         | 3.13          | 1               |
| CSF3     | colony stimulating factor 3 (granulocyte)                                          | 2.74         | 1.45          | 0.00            | 0.03              | 1               | 1.03        | 0.04         | NA      | NA          | 0              | 213.26       | 7.74          | 1               |
| RNASE1   | ribonuclease, 1 (house A family, 1 pancreatic)                                     | 62.15        | 5.96          | 0.00            | 0.00              | 1               | -1.01       | -0.01        | NA      | NA          | 0              | NA           | NA            | 0               |
| NDP      | noddy disease (neurodegeneration)                                                  | 53.05        | 5.73          | 0.00            | 0.00              | 1               | -1.01       | -0.01        | NA      | NA          | 0              | NA           | NA            | 0               |
| PLIN5    | perilipin 5                                                                        | 40.35        | 5.33          | 0.00            | 0.00              | 1               | NA          | NA           | NA      | NA          | 0              | NA           | NA            | 0               |
| NA       | NA                                                                                 | 24.53        | 4.62          | 0.00            | 0.00              | 1               | NA          | NA           | NA      | NA          | 0              | NA           | NA            | 0               |
| SOST     | sclerostin                                                                         | 22.96        | 4.52          | 0.00            | 0.00              | 1               | NA          | NA           | NA      | NA          | 0              | NA           | NA            | 0               |
| CLDN17   | claudin 17                                                                         | 21.36        | 4.42          | 0.00            | 0.01              | 1               | 3.99        | 2.00         | 0.00    | 0.33        | 0              | NA           | NA            | 0               |
| PIPOX    | peroxisomal acid oxidase                                                           | 16.69        | 4.06          | 0.00            | 0.00              | 1               | -1.02       | -0.03        | NA      | NA          | 0              | NA           | NA            | 0               |
| HYAL4    | hyaluronoglucosaminidase 4                                                         | 13.43        | 3.75          | 0.00            | 0.03              | 1               | -1.00       | 0.00         | NA      | NA          | 0              | NA           | NA            | 0               |
| ACPP     | acid phosphatase, prostatic                                                        | 12.98        | 3.70          | 0.00            | 0.01              | 1               | NA          | NA           | NA      | NA          | 0              | NA           | NA            | 0               |
| IL19     | interleukin 19                                                                     | 12.82        | 3.68          | 0.00            | 0.01              | 1               | -1.00       | -0.01        | NA      | NA          | 0              | NA           | NA            | 0               |
| S100A7A  | S100 calcium binding protein A7A                                                   | 12.70        | 3.67          | 0.00            | 0.01              | 1               | NA          | NA           | NA      | NA          | 0              | NA           | NA            | 0               |
| ACPP     | acid phosphatase, prostatic                                                        | 12.24        | 3.61          | 0.00            | 0.01              | 1               | -1.01       | -0.01        | NA      | NA          | 0              | NA           | NA            | 0               |
| IL23A    | interleukin 23, alpha subunit p19                                                  | 11.53        | 3.53          | 0.00            | 0.00              | 1               | 2.14        | 1.10         | 0.07    | 1.00        | 0              | NA           | NA            | 0               |
| LRG1     | leucine-rich alpha-2-glycoprotein 1                                                | 10.04        | 3.33          | 0.00            | 0.03              | 1               | NA          | NA           | NA      | NA          | 0              | NA           | NA            | 0               |
| AGPAT9   | 1-acylglycerol 3-phosphate O-acyltransferase 9                                     | 8.98         | 3.17          | 0.00            | 0.00              | 1               | NA          | NA           | NA      | NA          | 0              | NA           | NA            | 0               |
| NA       | NA                                                                                 | 8.79         | 3.14          | 0.00            | 0.01              | 1               | NA          | NA           | NA      | NA          | 0              | NA           | NA            | 0               |
| KRT24    | keratin 24                                                                         | 8.42         | 3.07          | 0.00            | 0.06              | 1               | 1.09        | 0.13         | 0.62    | 1.00        | 0              | NA           | NA            | 0               |
| DSCAM    | desmosomal cadherin adhesion molecule                                              | 8.25         | 3.04          | 0.00            | 0.00              | 1               | NA          | NA           | NA      | NA          | 0              | NA           | NA            | 0               |
| SLC26A9  | solute carrier family 26, member 9                                                 | 8.13         | 3.02          | 0.00            | 0.01              | 1               | NA          | NA           | NA      | NA          | 0              | NA           | NA            | 0               |
| XDH      | xanthine dehydrogenase                                                             | 8.03         | 3.01          | 0.00            | 0.01              | 1               | -1.33       | -0.41        | 0.47    | 1.00        | 0              | NA           | NA            | 0               |
| PRR9     | proline-rich 9                                                                     | 7.97         | 3.00          | 0.00            | 0.07              | 1               | NA          | NA           | NA      | NA          | 0              | NA           | NA            | 0               |
| NA       | NA                                                                                 | 7.85         | 2.97          | 0.00            | 0.02              | 1               | NA          | NA           | NA      | NA          | 0              | NA           | NA            | 0               |
| FBXO45   | F-box protein 45                                                                   | 7.60         | 2.93          | 0.00            | 0.01              | 1               | NA          | NA           | NA      | NA          | 0              | NA           | NA            | 0               |
| NA       | NA                                                                                 | 7.23         | 2.85          | 0.00            | 0.06              | 1               | NA          | NA           | NA      | NA          | 0              | NA           | NA            | 0               |
| FCHSD1   | FCH and double SHD domain 1                                                        | 7.19         | 2.85          | 0.00            | 0.02              | 1               | NA          | NA           | NA      | NA          | 0              | NA           | NA            | 0               |
| TGM3     | transglutaminase 3 (3D polypeptide, protein-glutamine-gamma-glutamyltransferase)   | 7.15         | 2.84          | 0.00            | 0.01              | 1               | -1.00       | 0.00         | NA      | NA          | 0              | NA           | NA            | 0               |
| TRPM8    | transient receptor potential cation channel, subfamily M, member 8                 | 6.86         | 2.78          | 0.00            | 0.09              | 1               | NA          | NA           | NA      | NA          | 0              | NA           | NA            | 0               |
| FCHSD1   | FCH and double SHD domain 1                                                        | 6.76         | 2.76          | 0.00            | 0.01              | 1               | NA          | NA           | NA      | NA          | 0              | NA           | NA            | 0               |
| KIAA1239 | KIAA1239                                                                           | 6.67         | 2.74          | 0.00            | 0.04              | 1               | NA          | NA           | NA      | NA          | 0              | NA           | NA            | 0               |
| KRT75    | keratin 75                                                                         | 6.63         | 2.73          | 0.00            | 0.00              | 1               | 1.54        | 0.62         | 0.03    | 1.00        | 0              | NA           | NA            | 0               |
| VNN3     | vannin 3                                                                           | 6.61         | 2.72          | 0.00            | 0.00              | 1               | 1.00        | 0.00         | NA      | NA          | 0              | NA           | NA            | 0               |
| NA       | NA                                                                                 | 6.52         | 2.70          | 0.00            | 0.00              | 1               | NA          | NA           | NA      | NA          | 0              | NA           | NA            | 0               |
| CHI3L2   | chitinase 3-like 2                                                                 | 6.41         | 2.68          | 0.00            | 0.03              | 1               | -1.00       | 0.00         | NA      | NA          | 0              | NA           | NA            | 0               |
| PMFBP1   | perlecan microfibril-binding protein 1                                             | 6.21         | 2.64          | 0.00            | 0.01              | 1               | -1.00       | 0.00         | NA      | NA          | 0              | NA           | NA            | 0               |
| NA       | NA                                                                                 | 6.15         | 2.62          | 0.00            | 0.03              | 1               | NA          | NA           | NA      | NA          | 0              | NA           | NA            | 0               |
| TCF11L2  | TCF11L2                                                                            | 6.06         | 2.60          | 0.00            | 0.03              | 1               | NA          | NA           | NA      | NA          | 0              | NA           | NA            | 0               |
| TREX2    | transcription factor IIIA-related exonuclease 2                                    | 5.93         | 2.57          | 0.00            | 0.05              | 1               | -1.00       | 0.00         | NA      | NA          | 0              | NA           | NA            | 0               |
| ATP12A   | ATPase, Na+/K+ transporting, noncatalytic, alpha polypeptide                       | 5.89         | 2.56          | 0.00            | 0.00              | 1               | 2.40        | 1.26         | 0.13    | 1.00        | 0              | NA           | NA            | 0               |
| NA       | NA                                                                                 | 5.50         | 2.46          | 0.00            | 0.08              | 1               | NA          | NA           | NA      | NA          | 0              | NA           | NA            | 0               |
| C4orf19  | chromosome 4 open reading frame 19                                                 | 5.42         | 2.44          | 0.00            | 0.04              | 1               | -1.01       | -0.01        | NA      | NA          | 0              | NA           | NA            | 0               |
| HPSE     | heparanase                                                                         | 5.36         | 2.42          | 0.00            | 0.06              | 1               | NA          | NA           | NA      | NA          | 0              | NA           | NA            | 0               |
| SPRR4    | small proline-rich protein 4                                                       | 5.23         | 2.39          | 0.00            | 0.02              | 1               | NA          | NA           | NA      | NA          | 0              | NA           | NA            | 0               |
| NCF2     | neutrophil cytosolic factor 2                                                      | 5.21         | 2.38          | 0.00            | 0.10              | 1               | NA          | NA           | NA      | NA          | 0              | NA           | NA            | 0               |
| CDH26    | cadherin 26                                                                        | 5.19         | 2.38          | 0.00            | 0.01              | 1               | 2.25        | 1.17         | 0.00    | 0.26        | 0              | NA           | NA            | 0               |
| EXPH5    | exophilin 5                                                                        | 5.10         | 2.35          | 0.00            | 0.01              | 1               | NA          | NA           | NA      | NA          | 0              | NA           | NA            | 0               |
| TGFA     | transforming growth factor, alpha                                                  | 5.07         | 2.34          | 0.00            | 0.01              | 1               | 1.06        | 0.09         | 0.88    | 1.00        | 0              | NA           | NA            | 0               |
| GM2A     | GM2 ganglioside activator                                                          | 5.04         | 2.33          | 0.00            | 0.04              | 1               | 1.15        | 0.20         | 0.56    | 1.00        | 0              | NA           | NA            | 0               |
| NA       | NA                                                                                 | 4.98         | 2.32          | 0.00            | 0.04              | 1               | 2.21        | 1.15         | 0.26    | 1.00        | 0              | NA           | NA            | 0               |
| C15orf62 | chromosome 15 open reading frame 62                                                | 4.89         | 2.29          | 0.00            | 0.06              | 1               | NA          | NA           | NA      | NA          | 0              | NA           | NA            | 0               |
| KLK13    | kallikrein-related peptidase 13                                                    | 4.75         | 2.25          | 0.00            | 0.10              | 1               | 1.03        | 0.04         | 0.77    | 1.00        | 0              | NA           | NA            | 0               |
| SLC35E4  | solute carrier family 35, member 54                                                | 4.72         | 2.24          | 0.00            | 0.02              | 1               | NA          | NA           | NA      | NA          | 0              | NA           | NA            | 0               |
| CD177    | CD177 molecule                                                                     | 4.71         | 2.23          | 0.00            | 0.00              | 1               | -1.01       | -0.01        | NA      | NA          | 0              | NA           | NA            | 0               |
| NA       | NA                                                                                 | 4.69         | 2.23          | 0.00            | 0.10              | 1               | -1.01       | -0.01        | NA      | NA          | 0              | NA           | NA            | 0               |
| NDRG2    | NDRG2 family member 2                                                              | 4.58         | 2.20          | 0.00            | 0.02              | 1               | -1.00       | -0.01        | NA      | NA          | 0              | NA           | NA            | 0               |
| KLK13    | kallikrein-related peptidase 13                                                    | 4.57         | 2.19          | 0.00            | 0.08              | 1               | -1.00       | -0.01        | NA      | NA          | 0              | NA           | NA            | 0               |
| STB3IA4  | STB3 alpha/beta/amyloid precursor domain alpha-2-8 subunit/transferase 4           | 4.48         | 2.16          | 0.00            | 0.03              | 1               | NA          | NA           | NA      | NA          | 0              | NA           | NA            | 0               |
| NDRG2    | NDRG2 family member 2                                                              | 4.47         | 2.16          | 0.00            | 0.02              | 1               | 10.07       | 3.33         | 0.01    | 0.63        | 0              | NA           | NA            | 0               |
| ADAP2    | ADAP2 with dual PH domain 2                                                        | 4.42         | 2.14          | 0.00            | 0.05              | 1               | 1.70        | 0.76         | 0.03    | 1.00        | 0              | NA           | NA            | 0               |
| IL1F8    | interleukin 1 family, member 8 (beta)                                              | 4.34         | 2.12          | 0.00            | 0.09              | 1               | NA          | NA           | NA      | NA          | 0              | NA           | NA            | 0               |
| CEBPA    | CCAAT/enhancer binding protein (C/EBP) alpha                                       | 4.28         | 2.10          | 0.00            | 0.01              | 1               | 1.15        | 0.20         | 0.67    | 1.00        | 0              | NA           | NA            | 0               |
| ADAP2    | ADAP2 with dual PH domain 2                                                        | 4.26         | 2.09          | 0.00            | 0.10              | 1               | NA          | NA           | NA      | NA          | 0              | NA           | NA            | 0               |
| SOX7     | SOX7 (also determining region V1-box 7)                                            | 4.22         | 2.08          | 0.00            | 0.02              | 1               | NA          | NA           | NA      | NA          | 0              | NA           | NA            | 0               |
| NA       | NA                                                                                 | 4.21         | 2.07          | 0.00            | 0.02              | 1               | NA          | NA           | NA      | NA          | 0              | NA           | NA            | 0               |
| ATP1B1   | ATPase, Na+/K+ transporting, beta 1 polypeptide                                    | 4.17         | 2.06          | 0.00            | 0.10              | 1               | 2.37        | 1.25         | 0.01    | 0.74        | 0              | NA           | NA            | 0               |
| TCF11L2  | TCF11L2                                                                            | 4.13         | 2.05          | 0.00            | 0.08              | 1               | NA          | NA           | NA      | NA          | 0              | NA           | NA            | 0               |
| HPSE     | heparanase                                                                         | 4.09         | 2.03          | 0.00            | 0.02              | 1               | 1.57        | 0.65         | 0.02    | 0.94        | 0              | NA           | NA            | 0               |
| ZDHHC21  | zinc finger, CCHC-type containing 21                                               | 4.09         | 2.03          | 0.00            | 0.07              | 1               | NA          | NA           | NA      | NA          | 0              | NA           | NA            | 0               |
| NA       | NA                                                                                 | 4.04         | 2.02          | 0.00            | 0.01              | 1               | NA          | NA           | NA      | NA          | 0              | NA           | NA            | 0               |
| FAM3D    | family with sequence similarity 3, member D                                        | 4.03         | 2.01          | 0.00            | 0.04              | 1               | NA          | NA           | NA      | NA          | 0              | NA           | NA            | 0               |
| BMP2     | bone morphogenetic protein 2                                                       | 3.94         | 1.98          | 0.00            | 0.08              | 1               | 2.70        | 1.43         | 0.01    | 0.78        | 0              | NA           | NA            | 0               |
| NA       | NA                                                                                 | 3.91         | 1.97          | 0.00            | 0.00              | 1               | NA          | NA           | NA      | NA          | 0              | NA           | NA            | 0               |
| NA       | NA                                                                                 | 3.86         | 1.95          | 0.00            | 0.00              | 1               | NA          | NA           | NA      | NA          | 0              | NA           | NA            | 0               |
| NA       | NA                                                                                 | 3.81         | 1.93          | 0.00            | 0.04              | 1               | NA          | NA           | NA      | NA          | 0              | NA           | NA            | 0               |
| HR       | heparanase (heparanase)                                                            | 3.80         | 1.93          | 0.00            | 0.02              | 1               | -1.41       | -0.50        | 0.11    | 1.00        | 0              | NA           | NA            | 0               |
| NFKBIZ   | nuclear factor of kappa light polypeptide gene enhancer in B-cells inhibitor, zeta | 3.75         | 1.91          | 0.00            | 0.04              | 1               | NA          | NA           | NA      | NA          | 0              | NA           | NA            | 0               |
| NA       | NA                                                                                 | 3.73         | 1.90          | 0.00            | 0.03              | 1               | 1.97        | 0.97         | 0.06    | 1.00        | 0              | NA           | NA            | 0               |
| FBXO45   | F-box protein 45                                                                   | 3.65         | 1.87          | 0.00            | 0.00              | 1               | NA          | NA           | NA      | NA          | 0              | NA           | NA            | 0               |
| FAM181B  | family with sequence similarity 181, member B                                      | 3.65         | 1.87          | 0.00            | 0.01              | 1               | NA          | NA           | NA      | NA          | 0              | NA           | NA            | 0               |
| LIP3     | lipin 3                                                                            | 3.57         | 1.83          | 0.00            | 0.                |                 |             |              |         |             |                |              |               |                 |

|              |                                                                                                     |      |      |      |      |   |       |       |      |      |   |       |       |   |
|--------------|-----------------------------------------------------------------------------------------------------|------|------|------|------|---|-------|-------|------|------|---|-------|-------|---|
| NA           | NA                                                                                                  | 3.27 | 1.71 | 0.00 | 0.09 | 1 | NA    | NA    | NA   | NA   | 0 | NA    | NA    | 0 |
| RNASE7       | Bromodomain, TFIIS A family, 7                                                                      | 3.23 | 1.69 | 0.00 | 0.01 | 1 | NA    | NA    | NA   | NA   | 0 | NA    | NA    | 0 |
| NA           | NA                                                                                                  | 3.23 | 1.69 | 0.00 | 0.04 | 1 | NA    | NA    | NA   | NA   | 0 | NA    | NA    | 0 |
| XDH          | Adenosine deaminase                                                                                 | 3.21 | 1.68 | 0.00 | 0.03 | 1 | NA    | NA    | NA   | NA   | 0 | NA    | NA    | 0 |
| GM2A         | G6PD ganglioside activator                                                                          | 3.21 | 1.68 | 0.00 | 0.01 | 1 | 1.84  | 0.88  | 0.31 | 1.00 | 0 | NA    | NA    | 0 |
| FBXO45       | F box protein 45                                                                                    | 3.18 | 1.67 | 0.00 | 0.01 | 1 | NA    | NA    | NA   | NA   | 0 | NA    | NA    | 0 |
| HELLS        | Helicase, lymphoid-specific                                                                         | 3.15 | 1.65 | 0.00 | 0.02 | 1 | 1.23  | 0.29  | 0.39 | 1.00 | 0 | NA    | NA    | 0 |
| SERPINA1     | serpin peptidase inhibitor, class A (alpha-1 antitrypsin, antitrypsin, member 1)                    | 3.08 | 1.62 | 0.00 | 0.06 | 1 | -1.02 | -0.03 | NA   | NA   | 0 | NA    | NA    | 0 |
| TFGA         | transforming growth factor, alpha                                                                   | 3.08 | 1.62 | 0.00 | 0.05 | 1 | 1.22  | 0.28  | 0.68 | 1.00 | 0 | NA    | NA    | 0 |
| STEA4        | STEAP family member 4                                                                               | 3.08 | 1.62 | 0.00 | 0.04 | 1 | 1.02  | 0.03  | 0.94 | 1.00 | 0 | NA    | NA    | 0 |
| WWTR1        | Wnt1 domain-containing transcription regulator 1                                                    | 3.05 | 1.61 | 0.00 | 0.04 | 1 | -1.12 | -0.16 | 0.42 | 1.00 | 0 | NA    | NA    | 0 |
| KCNQ3        | potassium voltage-gated channel, Shal-related subfamily, member 3                                   | 3.03 | 1.60 | 0.00 | 0.01 | 1 | -1.02 | -0.02 | NA   | NA   | 0 | NA    | NA    | 0 |
| TGM1         | transglutaminase 1 (K, peptidoglycan epimerase type 1, protein-glutamine-gamma-glutamyltransferase) | 3.01 | 1.59 | 0.00 | 0.02 | 1 | 1.50  | 0.59  | 0.02 | 0.90 | 0 | NA    | NA    | 0 |
| TMC5         | transmembrane channel-like 5                                                                        | 3.00 | 1.59 | 0.00 | 0.01 | 1 | NA    | NA    | NA   | NA   | 0 | NA    | NA    | 0 |
| ACPP         | acid phosphatase, probate                                                                           | 2.98 | 1.58 | 0.00 | 0.01 | 1 | NA    | NA    | NA   | NA   | 0 | NA    | NA    | 0 |
| LOC100134229 | hypothetical protein LOC100134229                                                                   | 2.96 | 1.56 | 0.00 | 0.06 | 1 | NA    | NA    | NA   | NA   | 0 | NA    | NA    | 0 |
| FST          | fibronectin                                                                                         | 2.95 | 1.56 | 0.00 | 0.07 | 1 | 1.12  | 0.16  | 0.10 | 1.00 | 0 | NA    | NA    | 0 |
| KCN51        | potassium voltage-gated channel, delayed rectifier, subfamily 5, member 1                           | 2.94 | 1.56 | 0.00 | 0.02 | 1 | -1.00 | -0.01 | NA   | NA   | 0 | NA    | NA    | 0 |
| WFD5         | WDFP-like domain core domain 5                                                                      | 2.92 | 1.55 | 0.00 | 0.07 | 1 | NA    | NA    | NA   | NA   | 0 | NA    | NA    | 0 |
| GFOD2        | glucose fructose oxidoreductase domain containing 2                                                 | 2.91 | 1.54 | 0.00 | 0.02 | 1 | 1.13  | 0.18  | 0.26 | 1.00 | 0 | NA    | NA    | 0 |
| SULT2B1      | sulfotransferase family, cytosolic, 2B, member 1                                                    | 2.89 | 1.53 | 0.00 | 0.06 | 1 | 1.20  | 0.26  | 0.40 | 1.00 | 0 | NA    | NA    | 0 |
| KULK6        | kulshammer-related peptidase 6                                                                      | 2.89 | 1.53 | 0.00 | 0.04 | 1 | 2.48  | 1.31  | 0.19 | 1.00 | 0 | NA    | NA    | 0 |
| HSD17B2      | hydroxysteroid oxidoreductase 17B family member 2                                                   | 2.89 | 1.53 | 0.00 | 0.01 | 1 | 1.38  | 0.47  | 0.42 | 1.00 | 0 | NA    | NA    | 0 |
| SERPINA1     | serpin peptidase inhibitor, class A (alpha-1 antitrypsin, antitrypsin, member 1)                    | 2.88 | 1.53 | 0.00 | 0.09 | 1 | -1.01 | -0.01 | NA   | NA   | 0 | NA    | NA    | 0 |
| ANKRD22      | ankyrin repeat domain 22                                                                            | 2.88 | 1.53 | 0.00 | 0.03 | 1 | NA    | NA    | NA   | NA   | 0 | NA    | NA    | 0 |
| TMEM38A      | transmembrane protein 38A                                                                           | 2.88 | 1.53 | 0.00 | 0.08 | 1 | NA    | NA    | NA   | NA   | 0 | NA    | NA    | 0 |
| FST          | fibronectin                                                                                         | 2.88 | 1.53 | 0.00 | 0.08 | 1 | 1.10  | 0.13  | 0.44 | 1.00 | 0 | NA    | NA    | 0 |
| FRY          | fray homolog (Drosophila)                                                                           | 2.87 | 1.52 | 0.00 | 0.04 | 1 | 1.26  | 0.33  | 0.40 | 1.00 | 0 | -1.23 | -0.30 | 0 |
| NA           | NA                                                                                                  | 2.85 | 1.51 | 0.00 | 0.00 | 1 | NA    | NA    | NA   | NA   | 0 | NA    | NA    | 0 |
| NA           | NA                                                                                                  | 2.84 | 1.51 | 0.00 | 0.08 | 1 | NA    | NA    | NA   | NA   | 0 | NA    | NA    | 0 |
| NA           | NA                                                                                                  | 2.83 | 1.50 | 0.00 | 0.03 | 1 | 1.21  | 0.28  | 0.33 | 1.00 | 0 | NA    | NA    | 0 |
| ANKRD22      | ankyrin repeat domain 22                                                                            | 2.82 | 1.50 | 0.00 | 0.07 | 1 | NA    | NA    | NA   | NA   | 0 | NA    | NA    | 0 |
| ROBO4        | roundabout homolog 4, magic roundabout (Drosophila)                                                 | 2.81 | 1.49 | 0.00 | 0.09 | 1 | NA    | NA    | NA   | NA   | 0 | NA    | NA    | 0 |
| ADAM8        | ADAM metalloproteinase domain 8                                                                     | 2.80 | 1.49 | 0.00 | 0.01 | 1 | 1.14  | 0.19  | 0.23 | 1.00 | 0 | NA    | NA    | 0 |
| CNFI         | cardiolipin                                                                                         | 2.80 | 1.48 | 0.00 | 0.05 | 1 | NA    | NA    | NA   | NA   | 0 | NA    | NA    | 0 |
| EPHX3        | epoxide hydrolase 3                                                                                 | 2.79 | 1.48 | 0.00 | 0.00 | 1 | 2.22  | 1.15  | 0.01 | 0.77 | 0 | NA    | NA    | 0 |
| CLCN5        | chloride channel 5                                                                                  | 2.79 | 1.48 | 0.00 | 0.05 | 1 | -1.02 | -0.03 | 0.79 | 1.00 | 0 | NA    | NA    | 0 |
| DAPP1        | distal regulator of phosphatidylinositol and 5-phosphatidylates                                     | 2.78 | 1.48 | 0.00 | 0.06 | 1 | NA    | NA    | NA   | NA   | 0 | NA    | NA    | 0 |
| ITSN2        | intersectin 2                                                                                       | 2.77 | 1.47 | 0.00 | 0.06 | 1 | NA    | NA    | NA   | NA   | 0 | NA    | NA    | 0 |
| KCNK10       | potassium channel, subfamily K, member 10                                                           | 2.75 | 1.46 | 0.00 | 0.04 | 1 | NA    | NA    | NA   | NA   | 0 | NA    | NA    | 0 |
| TMEM40       | transmembrane protein 40                                                                            | 2.75 | 1.46 | 0.00 | 0.07 | 1 | 1.27  | 0.34  | 0.21 | 1.00 | 0 | NA    | NA    | 0 |
| PP1F         | protein phosphatase 1-like growth factor                                                            | 2.74 | 1.45 | 0.00 | 0.02 | 1 | 1.51  | 0.59  | 0.18 | 1.00 | 0 | NA    | NA    | 0 |
| HBEGF        | hepatocyte growth factor                                                                            | 2.73 | 1.45 | 0.00 | 0.03 | 1 | 1.65  | 0.72  | 0.00 | 0.45 | 0 | 1.03  | 0.05  | 0 |
| LOC339400    | hypothetical LOC339400                                                                              | 2.73 | 1.45 | 0.00 | 0.04 | 1 | NA    | NA    | NA   | NA   | 0 | NA    | NA    | 0 |
| NA           | NA                                                                                                  | 2.72 | 1.44 | 0.00 | 0.07 | 1 | NA    | NA    | NA   | NA   | 0 | NA    | NA    | 0 |
| PRKCH        | protein kinase C, eta                                                                               | 2.72 | 1.44 | 0.00 | 0.03 | 1 | 1.03  | 0.04  | 0.80 | 1.00 | 0 | NA    | NA    | 0 |
| NA           | NA                                                                                                  | 2.72 | 1.44 | 0.00 | 0.06 | 1 | NA    | NA    | NA   | NA   | 0 | NA    | NA    | 0 |
| SLC5A1       | solute carrier family 5 (sodium/glucose cotransporter), member 1                                    | 2.71 | 1.44 | 0.00 | 0.03 | 1 | NA    | NA    | NA   | NA   | 0 | NA    | NA    | 0 |
| MEIT10D      | MEIT10 domain-containing 1                                                                          | 2.70 | 1.43 | 0.00 | 0.04 | 1 | -1.20 | -0.27 | 0.52 | 1.00 | 0 | NA    | NA    | 0 |
| C17orf96     | chromosome 17 open reading frame 96                                                                 | 2.69 | 1.43 | 0.00 | 0.03 | 1 | NA    | NA    | NA   | NA   | 0 | NA    | NA    | 0 |
| IL1F5        | interleukin 1 family, member 5 (delta)                                                              | 2.68 | 1.42 | 0.00 | 0.01 | 1 | 2.03  | 1.02  | 0.00 | 0.42 | 0 | NA    | NA    | 0 |
| LRRC20       | leucine-rich repeat containing 20                                                                   | 2.67 | 1.42 | 0.00 | 0.08 | 1 | 1.16  | 0.22  | 0.06 | 1.00 | 0 | NA    | NA    | 0 |
| NA           | NA                                                                                                  | 2.65 | 1.41 | 0.00 | 0.09 | 1 | NA    | NA    | NA   | NA   | 0 | NA    | NA    | 0 |
| DOC9         | domain of cytochrome 9                                                                              | 2.65 | 1.40 | 0.00 | 0.06 | 1 | -1.03 | -0.04 | 0.80 | 1.00 | 0 | NA    | NA    | 0 |
| LDLR         | low density lipoprotein receptor                                                                    | 2.64 | 1.40 | 0.00 | 0.04 | 1 | -1.19 | -0.25 | 0.74 | 1.00 | 0 | NA    | NA    | 0 |
| FCGBP        | Fc fragment of IgG binding protein                                                                  | 2.62 | 1.39 | 0.00 | 0.02 | 1 | -1.00 | -0.01 | NA   | NA   | 0 | NA    | NA    | 0 |
| SMPD1        | sphingomyelin phosphodiesterase 1, acid (lysosomal)                                                 | 2.61 | 1.38 | 0.00 | 0.01 | 1 | 1.52  | 0.60  | 0.04 | 1.00 | 0 | NA    | NA    | 0 |
| HR           | heparanase homolog (mouse)                                                                          | 2.60 | 1.38 | 0.00 | 0.01 | 1 | NA    | NA    | NA   | NA   | 0 | NA    | NA    | 0 |
| NA           | NA                                                                                                  | 2.60 | 1.38 | 0.00 | 0.03 | 1 | 1.26  | 0.33  | 0.42 | 1.00 | 0 | NA    | NA    | 0 |
| HSPB8        | heat shock 28kDa protein 8                                                                          | 2.60 | 1.38 | 0.00 | 0.01 | 1 | NA    | NA    | NA   | NA   | 0 | NA    | NA    | 0 |
| PLIN4        | perilipin 4                                                                                         | 2.59 | 1.37 | 0.00 | 0.00 | 1 | NA    | NA    | NA   | NA   | 0 | NA    | NA    | 0 |
| HMOX2        | hemoxygenase (acylating) 2                                                                          | 2.59 | 1.37 | 0.00 | 0.03 | 1 | 1.39  | 0.48  | 0.00 | 0.31 | 0 | NA    | NA    | 0 |
| BDH1         | D-hydroxybutyrate dehydrogenase, type 1                                                             | 2.58 | 1.37 | 0.00 | 0.04 | 1 | 1.30  | 0.37  | 0.22 | 1.00 | 0 | NA    | NA    | 0 |
| USP53        | ubiquitin-specific peptidase 53                                                                     | 2.58 | 1.37 | 0.00 | 0.06 | 1 | NA    | NA    | NA   | NA   | 0 | NA    | NA    | 0 |
| MAP3K9       | mitogen-activated protein kinase kinase kinase 9                                                    | 2.58 | 1.37 | 0.00 | 0.04 | 1 | 1.07  | 0.10  | 0.74 | 1.00 | 0 | NA    | NA    | 0 |
| CTOF57       | chromosome 7 open reading frame 57                                                                  | 2.56 | 1.36 | 0.00 | 0.01 | 1 | NA    | NA    | NA   | NA   | 0 | NA    | NA    | 0 |
| FHD1         | FHD domain-containing 1                                                                             | 2.56 | 1.35 | 0.00 | 0.08 | 1 | NA    | NA    | NA   | NA   | 0 | NA    | NA    | 0 |
| NA           | NA                                                                                                  | 2.55 | 1.35 | 0.00 | 0.04 | 1 | NA    | NA    | NA   | NA   | 0 | NA    | NA    | 0 |
| SPITLC2      | serine palmitoyltransferase, long chain base subunit 2                                              | 2.54 | 1.34 | 0.00 | 0.08 | 1 | 1.30  | 0.38  | 0.07 | 1.00 | 0 | NA    | NA    | 0 |
| SLC5A1       | solute carrier family 5 (sodium/glucose cotransporter), member 1                                    | 2.53 | 1.34 | 0.00 | 0.04 | 1 | -1.01 | -0.01 | NA   | NA   | 0 | NA    | NA    | 0 |
| FAM43A       | family with sequence similarity 43, member A                                                        | 2.52 | 1.33 | 0.00 | 0.03 | 1 | NA    | NA    | NA   | NA   | 0 | NA    | NA    | 0 |
| ODZ2         | odd, odd Cactin-in homolog 2 (Drosophila)                                                           | 2.51 | 1.33 | 0.00 | 0.02 | 1 | NA    | NA    | NA   | NA   | 0 | NA    | NA    | 0 |
| NA           | NA                                                                                                  | 2.51 | 1.33 | 0.00 | 0.08 | 1 | NA    | NA    | NA   | NA   | 0 | NA    | NA    | 0 |
| TMPPRSS11D   | transmembrane protein, secreted, 11D                                                                | 2.50 | 1.32 | 0.00 | 0.07 | 1 | 1.01  | 0.02  | 0.89 | 1.00 | 0 | NA    | NA    | 0 |
| CCNE1        | cyclin E1                                                                                           | 2.50 | 1.32 | 0.00 | 0.02 | 1 | 1.12  | 0.16  | 0.38 | 1.00 | 0 | NA    | NA    | 0 |
| ANKRD57      | ankyrin repeat domain 57                                                                            | 2.49 | 1.32 | 0.00 | 0.02 | 1 | 1.26  | 0.33  | 0.04 | 1.00 | 0 | NA    | NA    | 0 |
| DNAJA4       | DnaJ (Hsp40) homolog, subfamily A, member 4                                                         | 2.48 | 1.31 | 0.00 | 0.04 | 1 | NA    | NA    | NA   | NA   | 0 | NA    | NA    | 0 |
| CDYL         | chromodomain protein, Y-like                                                                        | 2.46 | 1.30 | 0.00 | 0.04 | 1 | 1.28  | 0.36  | 0.10 | 1.00 | 0 | NA    | NA    | 0 |
| GRHL3        | grahly-like 3 (Drosophila)                                                                          | 2.46 | 1.30 | 0.00 | 0.04 | 1 | NA    | NA    | NA   | NA   | 0 | NA    | NA    | 0 |
| NA           | NA                                                                                                  | 2.46 | 1.30 | 0.00 | 0.02 | 1 | NA    | NA    | NA   | NA   | 0 | NA    | NA    | 0 |
| CDH4         | cadherin 4, type 1, R (cadherin ratna)                                                              | 2.45 | 1.29 | 0.00 | 0.02 | 1 | 1.03  | 0.04  | 0.87 | 1.00 | 0 | NA    | NA    | 0 |
| ATP6V1C2     | ATPase, H+ transporting, lysosomal 42kDa, V1 subunit C2                                             | 2.45 | 1.29 | 0.00 | 0.04 | 1 | NA    | NA    | NA   | NA   | 0 | NA    | NA    | 0 |
| EXPH5        | exophilin 5                                                                                         | 2.45 | 1.29 | 0.00 | 0.02 | 1 | 1.09  | 0.12  | 0.42 | 1.00 | 0 | NA    | NA    | 0 |
| ZDHHC13      | zinc finger, DHHC-type containing 13                                                                | 2.45 | 1.29 | 0.00 | 0.04 | 1 | NA    | NA    | NA   | NA   | 0 | NA    | NA    | 0 |
| SEMA7A       | semaphorin 7A, GPI membrane anchor (Johns Millar blood group)                                       | 2.45 | 1.29 | 0.00 | 0.05 | 1 | 1.06  | 0.09  | 0.35 | 1.00 | 0 | NA    | NA    | 0 |
| GFOD2        | glucose fructose oxidoreductase domain containing 2                                                 | 2.44 | 1.29 | 0.00 | 0.02 | 1 | 1.06  | 0.09  | 0.35 | 1.00 | 0 | NA    | NA    | 0 |
| NA           | NA                                                                                                  | 2.42 | 1.28 | 0.00 | 0.07 | 1 | NA    | NA    | NA   | NA   | 0 | NA    | NA    | 0 |
| LDLR         | low density lipoprotein receptor                                                                    | 2.42 | 1.27 | 0.00 | 0.04 | 1 | -1.03 | -0.05 | 0.89 | 1.00 | 0 | NA    | NA    | 0 |
| TMEM171      | transmembrane protein 171                                                                           | 2.40 | 1.27 | 0.00 | 0.01 | 1 | NA    | NA    | NA   | NA   | 0 | NA    | NA    | 0 |
| RPS6K4       | ribosomal protein S6 kinase, 90kDa, polypeptide 4                                                   | 2.38 | 1.25 | 0.00 | 0.08 | 1 | -1.01 | -0.01 | 0.93 | 1.00 | 0 | NA    | NA    | 0 |
| NA           | NA                                                                                                  | 2.37 | 1.25 | 0.00 | 0.06 | 1 | NA    | NA    | NA   | NA   | 0 | NA    | NA    | 0 |
| HMGCS1       | HMG-CoA synthase (acylating) 1 (bacteria)                                                           | 2.37 | 1.24 | 0.00 | 0.02 | 1 | 1.05  | 0.07  | 0.82 | 1.00 | 0 | NA    | NA    | 0 |
| RABGGTA      | Rab guanine nucleotide exchange factor, alpha subunit                                               | 2.37 | 1.24 | 0.00 | 0.03 | 1 | 1.14  | 0.19  | 0.30 | 1.00 | 0 | NA    | NA    | 0 |
| GLUL         | glutamate aminotransferase                                                                          | 2.37 | 1.24 | 0.00 | 0.06 | 1 | 1.35  | 0.44  | 0.38 | 1.00 | 0 | NA    | NA    | 0 |
| PSG7         | progesterone-specific beta-1-glycoprotein 7 (gonadotropin)                                          | 2.36 | 1.24 | 0.00 | 0.02 | 1 | 1.04  | 0.05  | 0.77 | 1.00 | 0 | 0.00  | 0.00  | 0 |
| NA           | NA                                                                                                  | 2.36 | 1.24 | 0.00 | 0.05 | 1 | NA    | NA    | NA   | NA   | 0 | NA    | NA    | 0 |
| SPITLC2      | serine palmitoyltransferase, long chain base subunit 2                                              | 2.36 | 1.24 | 0.00 | 0.04 | 1 | 1.37  | 0.45  | 0.03 | 0.96 | 0 | NA    | NA    | 0 |
| UPP1         | uridine phosphorylase 1                                                                             | 2.36 | 1.24 | 0.00 | 0.08 | 1 | 1.21  | 0.19  | 0.13 | 1.00 | 0 | NA    | NA    | 0 |
| LOC152225    | hypothetical LOC152225                                                                              | 2.36 | 1.24 | 0.00 | 0.06 | 1 | NA    | NA    | NA   | NA   | 0 | NA    | NA    | 0 |
| TLF3         | transmembrane-like enhancer of alpha 3 (E2F1) homolog, Drosophila                                   | 2.34 | 1.23 | 0.00 | 0.04 | 1 | 1.20  | 0.26  |      |      |   |       |       |   |

|              |                                                                                    |      |      |      |      |   |       |       |      |      |   |       |       |   |
|--------------|------------------------------------------------------------------------------------|------|------|------|------|---|-------|-------|------|------|---|-------|-------|---|
| STAT3        | signal transducer and activator of transcription 3 (acute phase response factor)   | 2.18 | 1.12 | 0.00 | 0.02 | 1 | 1.03  | 0.04  | 0.88 | 1.00 | 0 | -1.14 | -0.19 | 0 |
| DCUN1D3      | DCN1, defective in cilia nephrosis 1, domain containing 3 (5, reversed)            | 2.18 | 1.12 | 0.00 | 0.01 | 1 | NA    | NA    | NA   | NA   | 0 | NA    | NA    | 0 |
| ITSN2        | intersectin 2                                                                      | 2.17 | 1.12 | 0.00 | 0.02 | 1 | 1.79  | 0.84  | 0.00 | 0.31 | 0 | NA    | NA    | 0 |
| TRIM62       | tristetraplin containing 62                                                        | 2.17 | 1.12 | 0.00 | 0.02 | 1 | 1.27  | 0.28  | 0.47 | 1.00 | 0 | 1.07  | 0.10  | 0 |
| PRKCH        | protein kinase C, eta                                                              | 2.17 | 1.12 | 0.00 | 0.02 | 1 | 1.30  | 0.38  | 0.02 | 0.88 | 0 | NA    | NA    | 0 |
| GLUL         | glutamate aminotransferase                                                         | 2.17 | 1.12 | 0.00 | 0.05 | 1 | 1.23  | 0.29  | 0.49 | 1.00 | 0 | NA    | NA    | 0 |
| NA           | NA                                                                                 | 2.16 | 1.11 | 0.00 | 0.05 | 1 | NA    | NA    | NA   | NA   | 0 | NA    | NA    | 0 |
| C1orf116     | chromosome 1 open reading frame 116                                                | 2.16 | 1.11 | 0.00 | 0.06 | 1 | -1.05 | -0.07 | 0.76 | 1.00 | 0 | NA    | NA    | 0 |
| GMPFB        | GMP-kinase phosphatidylinositol 8                                                  | 2.16 | 1.11 | 0.00 | 0.04 | 1 | 1.00  | 0.01  | 0.96 | 1.00 | 0 | NA    | NA    | 0 |
| SMPD1        | sphingomyelin phosphotransferase 1, and lysosomal                                  | 2.16 | 1.11 | 0.00 | 0.02 | 1 | 1.06  | 0.09  | NA   | NA   | 0 | NA    | NA    | 0 |
| DUSP16       | dual specificity phosphatase 16                                                    | 2.15 | 1.11 | 0.00 | 0.05 | 1 | NA    | NA    | NA   | NA   | 0 | NA    | NA    | 0 |
| NAMPT        | nicotinamide phosphoribosyltransferase                                             | 2.15 | 1.10 | 0.00 | 0.01 | 1 | NA    | NA    | NA   | NA   | 0 | NA    | NA    | 0 |
| SH3KBP1      | SH3-domain kinase binding protein 1                                                | 2.15 | 1.10 | 0.00 | 0.04 | 1 | NA    | NA    | NA   | NA   | 0 | NA    | NA    | 0 |
| ZDHHC21      | zinc finger, DHHC-type containing 21                                               | 2.15 | 1.10 | 0.00 | 0.10 | 1 | NA    | NA    | NA   | NA   | 0 | NA    | NA    | 0 |
| SAMD8        | sterile alpha motif domain containing 8                                            | 2.15 | 1.10 | 0.00 | 0.09 | 1 | NA    | NA    | NA   | NA   | 0 | NA    | NA    | 0 |
| SLC11A2      | soluble carrier family 11 (zinc-coupled divalent metal ion transporters), member 2 | 2.14 | 1.10 | 0.00 | 0.04 | 1 | 3.34  | 1.74  | 0.03 | 1.00 | 0 | 1.21  | 0.27  | 0 |
| OSBP2        | osimertinib binding protein 2                                                      | 2.14 | 1.10 | 0.00 | 0.06 | 1 | NA    | NA    | NA   | NA   | 0 | NA    | NA    | 0 |
| FAM83D       | fam83 with sequence similarity 63, member D                                        | 2.13 | 1.09 | 0.00 | 0.10 | 1 | NA    | NA    | NA   | NA   | 0 | NA    | NA    | 0 |
| GPR18        | G protein-coupled receptor 18                                                      | 2.13 | 1.09 | 0.00 | 0.08 | 1 | -1.01 | -0.01 | NA   | NA   | 0 | NA    | NA    | 0 |
| KATNB1       | catenin p80 (Wnt repeat containing), subunit B 1                                   | 2.13 | 1.09 | 0.00 | 0.03 | 1 | 1.24  | 0.31  | 0.09 | 1.00 | 0 | 1.01  | 0.01  | 0 |
| KLK10        | keratin-like protein 10                                                            | 2.13 | 1.09 | 0.00 | 0.01 | 1 | 1.20  | 0.26  | 0.34 | 1.00 | 0 | NA    | NA    | 0 |
| TMEM308      | transmembrane protein 308                                                          | 2.13 | 1.09 | 0.00 | 0.01 | 1 | 1.21  | 0.27  | 0.14 | 1.00 | 0 | NA    | NA    | 0 |
| GSAP1        | glucocorticoid-inducible serine/threonine phosphatase 1                            | 2.11 | 1.08 | 0.00 | 0.01 | 1 | 1.38  | 0.47  | 0.09 | 1.00 | 0 | NA    | NA    | 0 |
| LMTK2        | leontine kinase kinase 2                                                           | 2.11 | 1.07 | 0.00 | 0.08 | 1 | NA    | NA    | NA   | NA   | 0 | NA    | NA    | 0 |
| RUSC2        | RhoG and RhoG domain containing 2                                                  | 2.10 | 1.07 | 0.00 | 0.10 | 1 | 1.21  | 0.28  | 0.08 | 1.00 | 0 | NA    | NA    | 0 |
| DLX3         | distal-less homeobox 3                                                             | 2.10 | 1.07 | 0.00 | 0.06 | 1 | NA    | NA    | NA   | NA   | 0 | NA    | NA    | 0 |
| LYPD5        | LYSPLAUR domain containing 5                                                       | 2.09 | 1.07 | 0.00 | 0.08 | 1 | NA    | NA    | NA   | NA   | 0 | NA    | NA    | 0 |
| TLF3         | transfusion-like enhancer of alpha 2 (beta 1) homolog, (Drosophila)                | 2.09 | 1.06 | 0.00 | 0.04 | 1 | 1.20  | 0.26  | 0.25 | 1.00 | 0 | NA    | NA    | 0 |
| SDRAZ1       | serine/threonine phosphatase 1, and lysosomal                                      | 2.09 | 1.06 | 0.00 | 0.03 | 1 | NA    | NA    | NA   | NA   | 0 | NA    | NA    | 0 |
| CDV3         | CDV3 binding domain                                                                | 2.08 | 1.06 | 0.00 | 0.08 | 1 | 1.17  | 0.22  | 0.73 | 1.00 | 0 | -1.27 | -0.34 | 0 |
| CKAP4        | cytoskeleton-associated protein 4                                                  | 2.07 | 1.05 | 0.00 | 0.02 | 1 | 1.26  | 0.33  | 0.15 | 1.00 | 0 | NA    | NA    | 0 |
| ZNF800       | zinc finger protein 800                                                            | 2.06 | 1.04 | 0.00 | 0.09 | 1 | NA    | NA    | NA   | NA   | 0 | NA    | NA    | 0 |
| NSDHL        | NSDHL-dependent oxidized dihydrogenase-like                                        | 2.06 | 1.04 | 0.00 | 0.07 | 1 | 1.15  | 0.20  | 0.13 | 1.00 | 0 | NA    | NA    | 0 |
| TAOK1        | TAOK kinase 1                                                                      | 2.04 | 1.03 | 0.00 | 0.08 | 1 | NA    | NA    | NA   | NA   | 0 | NA    | NA    | 0 |
| NAMPT        | nicotinamide phosphoribosyltransferase                                             | 2.03 | 1.02 | 0.00 | 0.07 | 1 | NA    | NA    | NA   | NA   | 0 | NA    | NA    | 0 |
| TTC39A       | transmembrane protein 39A                                                          | 2.03 | 1.02 | 0.00 | 0.02 | 1 | 1.53  | 0.61  | 0.22 | 1.00 | 0 | NA    | NA    | 0 |
| USP6NL       | USP6-like domain                                                                   | 2.03 | 1.02 | 0.00 | 0.03 | 1 | 1.28  | 0.36  | 0.05 | 1.00 | 0 | NA    | NA    | 0 |
| RELL2        | RELL-like 2                                                                        | 2.02 | 1.02 | 0.00 | 0.09 | 1 | NA    | NA    | NA   | NA   | 0 | NA    | NA    | 0 |
| HECTD1       | HECT domain containing 1                                                           | 2.02 | 1.02 | 0.00 | 0.04 | 1 | NA    | NA    | NA   | NA   | 0 | NA    | NA    | 0 |
| TRIM62       | tristetraplin containing 62                                                        | 2.02 | 1.01 | 0.00 | 0.07 | 1 | 1.37  | 0.45  | 0.09 | 1.00 | 0 | -1.01 | -0.01 | 0 |
| ARNTL2       | aryl hydrocarbon receptor nuclear translocator-like 2                              | 2.02 | 1.01 | 0.00 | 0.05 | 1 | NA    | NA    | NA   | NA   | 0 | NA    | NA    | 0 |
| SHB          | src homology 2 domain containing adaptor protein B                                 | 2.01 | 1.01 | 0.00 | 0.10 | 1 | NA    | NA    | NA   | NA   | 0 | NA    | NA    | 0 |
| LOC100133660 | hypoxanthine phosphoribosyltransferase                                             | 2.01 | 1.01 | 0.00 | 0.05 | 1 | NA    | NA    | NA   | NA   | 0 | NA    | NA    | 0 |
| NA           | NA                                                                                 | 2.01 | 1.01 | 0.00 | 0.10 | 1 | NA    | NA    | NA   | NA   | 0 | NA    | NA    | 0 |
| ZDHHC13      | zinc finger, DHHC-type containing 13                                               | 2.01 | 1.01 | 0.00 | 0.03 | 1 | 1.25  | 0.32  | 0.48 | 1.00 | 0 | NA    | NA    | 0 |
| ARNTL2       | aryl hydrocarbon receptor nuclear translocator-like 2                              | 2.01 | 1.00 | 0.00 | 0.05 | 1 | 1.38  | 0.47  | 0.02 | 0.92 | 0 | -1.52 | -0.59 | 0 |
| PSG4         | pregneny specific beta-1 glycoprotein 4                                            | 2.00 | 1.00 | 0.00 | 0.04 | 1 | 1.04  | 0.06  | 0.95 | 1.00 | 0 | -1.01 | -0.01 | 0 |
| NA           | NA                                                                                 | 2.00 | 1.00 | 0.00 | 0.08 | 1 | NA    | NA    | NA   | NA   | 0 | NA    | NA    | 0 |
| ADRB2        | adrenergic, beta-2, receptor, surface                                              | 2.00 | 1.00 | 0.00 | 0.04 | 1 | 1.17  | 0.23  | 0.11 | 1.00 | 0 | NA    | NA    | 0 |
| SPIRE1       | spire homolog 1 (Drosophila)                                                       | 1.98 | 0.98 | 0.00 | 0.05 | 1 | NA    | NA    | NA   | NA   | 0 | NA    | NA    | 0 |
| FEZ1         | fosbactin and elongation protein beta 1 (yeast)                                    | 1.97 | 0.98 | 0.00 | 0.08 | 1 | 1.26  | 0.34  | 0.04 | 1.00 | 0 | NA    | NA    | 0 |
| MAP2K3       | mitogen-activated protein kinase kinase 3                                          | 1.97 | 0.98 | 0.00 | 0.03 | 1 | 1.00  | 0.00  | 0.99 | 1.00 | 0 | NA    | NA    | 0 |
| PSG6         | pregneny specific beta-1 glycoprotein 6                                            | 1.97 | 0.98 | 0.00 | 0.01 | 1 | 1.00  | 0.00  | NA   | NA   | 0 | NA    | NA    | 0 |
| KCTD11       | kettin domain containing 11                                                        | 1.96 | 0.97 | 0.00 | 0.07 | 1 | NA    | NA    | NA   | NA   | 0 | NA    | NA    | 0 |
| ODC1         | ornithine decarboxylase 1                                                          | 1.96 | 0.97 | 0.00 | 0.10 | 1 | 1.12  | 0.17  | 0.15 | 1.00 | 0 | -1.02 | -0.04 | 0 |
| NA           | NA                                                                                 | 1.96 | 0.97 | 0.00 | 0.04 | 1 | -1.00 | -0.01 | NA   | NA   | 0 | 1.37  | 0.45  | 0 |
| UGCG         | UDP-glucose co-synthase                                                            | 1.95 | 0.97 | 0.00 | 0.09 | 1 | 1.08  | 0.12  | 0.89 | 1.00 | 0 | NA    | NA    | 0 |
| NA           | NA                                                                                 | 1.95 | 0.96 | 0.00 | 0.10 | 1 | NA    | NA    | NA   | NA   | 0 | NA    | NA    | 0 |
| SLC25A25     | soluble carrier family 25 (mitochondrial carrier, phosphate carrier), member 25    | 1.95 | 0.96 | 0.00 | 0.07 | 1 | NA    | NA    | NA   | NA   | 0 | NA    | NA    | 0 |
| MPZL2        | myosin phosphatase-like 2                                                          | 1.95 | 0.96 | 0.00 | 0.04 | 1 | 1.32  | 0.40  | 0.34 | 1.00 | 0 | NA    | NA    | 0 |
| SOX7         | sox homolog 7 (Drosophila)                                                         | 1.94 | 0.96 | 0.00 | 0.04 | 1 | NA    | NA    | NA   | NA   | 0 | NA    | NA    | 0 |
| SHB          | src homology 2 domain containing adaptor protein B                                 | 1.94 | 0.95 | 0.00 | 0.08 | 1 | 1.11  | 0.15  | 0.41 | 1.00 | 0 | NA    | NA    | 0 |
| KRT80        | keratin 80                                                                         | 1.93 | 0.95 | 0.00 | 0.06 | 1 | NA    | NA    | NA   | NA   | 0 | NA    | NA    | 0 |
| GPR68        | G protein-coupled receptor 68                                                      | 1.93 | 0.95 | 0.00 | 0.03 | 1 | NA    | NA    | NA   | NA   | 0 | NA    | NA    | 0 |
| NA           | NA                                                                                 | 1.93 | 0.95 | 0.00 | 0.06 | 1 | -1.01 | -0.01 | NA   | NA   | 0 | NA    | NA    | 0 |
| JMY          | junction mediating and regulatory protein, p50 cofactor                            | 1.92 | 0.94 | 0.00 | 0.09 | 1 | 1.15  | 0.20  | 0.34 | 1.00 | 0 | NA    | NA    | 0 |
| POLYRFP4     | polyomavirus PTA protein 4                                                         | 1.92 | 0.94 | 0.00 | 0.09 | 1 | 1.62  | 0.70  | 0.09 | 1.00 | 0 | NA    | NA    | 0 |
| TMEM88       | transmembrane protein 88                                                           | 1.92 | 0.94 | 0.00 | 0.02 | 1 | NA    | NA    | NA   | NA   | 0 | NA    | NA    | 0 |
| CFLAR        | CASP8 and FADD-like apoptosis regulator                                            | 1.91 | 0.93 | 0.00 | 0.05 | 1 | 1.46  | 0.55  | 0.12 | 1.00 | 0 | NA    | NA    | 0 |
| KLF3         | Kruppel-like factor 3 (basic)                                                      | 1.91 | 0.93 | 0.00 | 0.08 | 1 | NA    | NA    | NA   | NA   | 0 | NA    | NA    | 0 |
| CFLAR        | CASP8 and FADD-like apoptosis regulator                                            | 1.91 | 0.93 | 0.00 | 0.07 | 1 | 1.28  | 0.36  | 0.17 | 1.00 | 0 | NA    | NA    | 0 |
| PRMT5        | protein arginine methyltransferase 5                                               | 1.89 | 0.92 | 0.00 | 0.04 | 1 | -1.06 | -0.09 | 0.25 | 1.00 | 0 | NA    | NA    | 0 |
| CARHSP1      | calcium regulated heat stable protein 1, 24kDa                                     | 1.89 | 0.92 | 0.00 | 0.08 | 1 | 1.15  | 0.20  | 0.21 | 1.00 | 0 | NA    | NA    | 0 |
| NA           | NA                                                                                 | 1.89 | 0.92 | 0.00 | 0.04 | 1 | NA    | NA    | NA   | NA   | 0 | NA    | NA    | 0 |
| NA           | NA                                                                                 | 1.88 | 0.91 | 0.00 | 0.08 | 1 | NA    | NA    | NA   | NA   | 0 | NA    | NA    | 0 |
| CFLAR        | CASP8 and FADD-like apoptosis regulator                                            | 1.88 | 0.91 | 0.00 | 0.10 | 1 | 1.28  | 0.35  | 0.08 | 1.00 | 0 | NA    | NA    | 0 |
| CDC45        | cell division cycle associated 5                                                   | 1.88 | 0.91 | 0.00 | 0.04 | 1 | NA    | NA    | NA   | NA   | 0 | NA    | NA    | 0 |
| SERPINB3     | serpin peptidase inhibitor, clade B (ovalbumin), member 3                          | 1.88 | 0.91 | 0.00 | 0.01 | 1 | 1.75  | 0.81  | 0.02 | 0.84 | 0 | NA    | NA    | 0 |
| NLRX1        | NLR family member X1                                                               | 1.87 | 0.91 | 0.00 | 0.09 | 1 | 1.15  | 0.20  | 0.34 | 1.00 | 0 | NA    | NA    | 0 |
| STK38L       | serine/threonine kinase 38-like                                                    | 1.87 | 0.90 | 0.00 | 0.10 | 1 | 1.11  | 0.15  | 0.28 | 1.00 | 0 | -1.37 | -0.45 | 0 |
| ALAS1        | aminolevulinic acid synthase 1                                                     | 1.86 | 0.89 | 0.00 | 0.07 | 1 | 1.12  | 0.16  | 0.09 | 1.00 | 0 | NA    | NA    | 0 |
| ACOX1        | acyl-CoA oxidase 1, peroxisomal                                                    | 1.85 | 0.89 | 0.00 | 0.06 | 1 | 1.55  | 0.63  | 0.05 | 1.00 | 0 | NA    | NA    | 0 |
| LPIN2        | lipin 2                                                                            | 1.85 | 0.89 | 0.00 | 0.04 | 1 | 1.11  | 0.15  | 0.18 | 1.00 | 0 | NA    | NA    | 0 |
| DNAJC5       | DnaJ (Hsp40) homolog, subfamily C, member 5                                        | 1.85 | 0.88 | 0.00 | 0.04 | 1 | NA    | NA    | NA   | NA   | 0 | NA    | NA    | 0 |
| NA           | NA                                                                                 | 1.84 | 0.88 | 0.00 | 0.05 | 1 | NA    | NA    | NA   | NA   | 0 | NA    | NA    | 0 |
| PTPN11       | protein tyrosine phosphatase, non-receptor type 11                                 | 1.83 | 0.88 | 0.00 | 0.07 | 1 | -1.04 | -0.08 | 0.90 | 1.00 | 0 | -1.12 | -0.17 | 0 |
| PRMT5        | protein arginine methyltransferase 5                                               | 1.83 | 0.87 | 0.00 | 0.02 | 1 | NA    | NA    | NA   | NA   | 0 | NA    | NA    | 0 |
| FEM1B        | fem-1 homolog b (C. elegans)                                                       | 1.83 | 0.87 | 0.00 | 0.05 | 1 | 1.15  | 0.20  | 0.13 | 1.00 | 0 | NA    | NA    | 0 |
| LRRC8B       | leucine rich repeat containing 8 family, member B                                  | 1.83 | 0.87 | 0.00 | 0.05 | 1 | 1.13  | 0.18  | 0.06 | 1.00 | 0 | NA    | NA    | 0 |
| NA           | NA                                                                                 | 1.82 | 0.86 | 0.00 | 0.08 | 1 | NA    | NA    | NA   | NA   | 0 | NA    | NA    | 0 |
| RRM2         | ribonucleic acid reductase 2                                                       | 1.82 | 0.86 | 0.00 | 0.05 | 1 | 1.04  | 0.06  | 0.52 | 1.00 | 0 | NA    | NA    | 0 |
| USP38        | ubiquitin specific peptidase 38                                                    | 1.81 | 0.86 | 0.00 | 0.10 | 1 | NA    | NA    | NA   | NA   | 0 | NA    | NA    | 0 |
| NA           | NA                                                                                 | 1.81 | 0.85 | 0.00 | 0.08 | 1 | NA    | NA    | NA   | NA   | 0 | NA    | NA    | 0 |
| KATNB1       | catenin p80 (Wnt repeat containing), subunit B 1                                   | 1.80 | 0.85 | 0.00 | 0.05 | 1 | NA    | NA    | NA   | NA   | 0 | NA    | NA    | 0 |
| NSDHL        | NSDHL-dependent oxidized dihydrogenase-like                                        | 1.80 | 0.85 | 0.00 | 0.08 | 1 | 1.05  | 0.07  | 0.50 | 1.00 | 0 | NA    | NA    | 0 |
| NA           | NA                                                                                 | 1.79 | 0.84 | 0.00 | 0.06 | 1 | NA    | NA    | NA   | NA   | 0 | NA    | NA    | 0 |
| TSC22D1      | TSC22 domain family, member 1                                                      | 1.79 | 0.84 | 0.00 | 0.04 | 1 | -1.20 | -0.26 | 0.05 | 1.00 | 0 | NA    | NA    | 0 |
| MPRIIP       | myosin phosphatase-like interacting protein                                        | 1.79 | 0.84 | 0.00 | 0.06 | 1 | NA    | NA    | NA   | NA   | 0 | NA    | NA    | 0 |
| TNFRSF4      | tumor necrosis factor receptor superfamily, member 4                               | 1.79 | 0.84 | 0.00 | 0.08 | 1 | -1.01 | -0.01 |      |      |   |       |       |   |

|          |                                                                                       |      |       |      |      |   |        |       |      |      |   |       |       |    |   |
|----------|---------------------------------------------------------------------------------------|------|-------|------|------|---|--------|-------|------|------|---|-------|-------|----|---|
| NA       | NA                                                                                    | 1.63 | 0.71  | 0.00 | 0.06 | 1 | 1.14   | 0.19  | 0.14 | 1.00 | 0 | NA    | NA    | NA | 0 |
| CARS     | cyclophilin B RNA helicase                                                            | 1.63 | 0.71  | 0.00 | 0.07 | 1 | NA     | NA    | NA   | NA   | 0 | NA    | NA    | NA | 0 |
| CVH43    | cell wall oligosacch 43 C-terminal homing (S. cerevisiae)                             | 1.81 | 0.89  | 0.00 | 0.02 | 1 | 1.59   | 0.67  | 0.04 | 1.00 | 0 | NA    | NA    | NA | 0 |
| KRT23    | Keratin 23 (keratinocyte keratin)                                                     | 1.61 | 0.69  | 0.00 | 0.10 | 1 | 1.92   | 0.94  | 0.02 | 0.94 | 0 | NA    | NA    | NA | 0 |
| PCSK6    | proprotein convertase subtilisin/kexin type 6                                         | 1.61 | 0.68  | 0.00 | 0.07 | 1 | 1.01   | 0.02  | NA   | NA   | 0 | NA    | NA    | NA | 0 |
| NA       | NA                                                                                    | 1.60 | 0.68  | 0.00 | 0.06 | 1 | NA     | NA    | NA   | NA   | 0 | NA    | NA    | NA | 0 |
| MYO1B    | myosin 1B                                                                             | 1.59 | 0.67  | 0.00 | 0.07 | 1 | 1.18   | 0.24  | 0.08 | 1.00 | 0 | NA    | NA    | NA | 0 |
| PRMT5    | protein arginase methyltransferase 5                                                  | 1.58 | 0.66  | 0.00 | 0.05 | 1 | NA     | NA    | NA   | NA   | 0 | NA    | NA    | NA | 0 |
| ATG7     | ATG7 autophagy related 7 homing (S. cerevisiae)                                       | 1.58 | 0.66  | 0.00 | 0.10 | 1 | NA     | NA    | NA   | NA   | 0 | NA    | NA    | NA | 0 |
| PPF1BP2  | PPF1BP2 interacting protein, binding protein 2 (Hspn beta 2)                          | 1.58 | 0.66  | 0.00 | 0.10 | 1 | 1.34   | 0.43  | 0.07 | 1.00 | 0 | -1.10 | -0.14 | NA | 0 |
| DTL      | dephosphinase homing (Drosophila)                                                     | 1.57 | 0.65  | 0.00 | 0.07 | 1 | NA     | NA    | NA   | NA   | 0 | NA    | NA    | NA | 0 |
| SEC23B   | Sec23 homing (S. cerevisiae)                                                          | 1.57 | 0.65  | 0.00 | 0.10 | 1 | 1.15   | 0.20  | 0.05 | 1.00 | 0 | NA    | NA    | NA | 0 |
| GBA2     | glucosylase, beta (beta gluc 2)                                                       | 1.57 | 0.65  | 0.00 | 0.10 | 1 | NA     | NA    | NA   | NA   | 0 | NA    | NA    | NA | 0 |
| PRDM1    | PRF domain containing 1, with ZNF domain                                              | 1.56 | 0.65  | 0.00 | 0.09 | 1 | NA     | NA    | NA   | NA   | 0 | NA    | NA    | NA | 0 |
| ZNF212   | zinc finger protein 212                                                               | 1.56 | 0.64  | 0.00 | 0.08 | 1 | -1.04  | -0.06 | 0.57 | 1.00 | 0 | NA    | NA    | NA | 0 |
| CDYL     | chromodomain protein, Y-like                                                          | 1.56 | 0.64  | 0.00 | 0.08 | 1 | 1.15   | 0.21  | 0.42 | 1.00 | 0 | NA    | NA    | NA | 0 |
| NA       | NA                                                                                    | 1.55 | 0.63  | 0.00 | 0.10 | 1 | 1.07   | 0.01  | 0.93 | 1.00 | 0 | -1.19 | -0.26 | NA | 0 |
| KIF1B    | kinesin family member 1B                                                              | 1.54 | 0.62  | 0.00 | 0.09 | 1 | NA     | NA    | NA   | NA   | 0 | NA    | NA    | NA | 0 |
| FJX1     | four jointed box 1 (Drosophila)                                                       | 1.54 | 0.62  | 0.00 | 0.09 | 1 | 1.05   | 0.06  | 0.84 | 1.00 | 0 | NA    | NA    | NA | 0 |
| NA       | NA                                                                                    | 1.54 | 0.62  | 0.00 | 0.06 | 1 | NA     | NA    | NA   | NA   | 0 | NA    | NA    | NA | 0 |
| QSOX2    | quiescin Q6, sulfhydryl oxidase 2                                                     | 1.53 | 0.62  | 0.00 | 0.06 | 1 | NA     | NA    | NA   | NA   | 0 | NA    | NA    | NA | 0 |
| ZCCHC6   | Zinc finger, C2HC domain containing 6                                                 | 1.53 | 0.62  | 0.00 | 0.08 | 1 | NA     | NA    | NA   | NA   | 0 | NA    | NA    | NA | 0 |
| CTPS     | CTP synthase                                                                          | 1.52 | 0.60  | 0.00 | 0.09 | 1 | 1.12   | 0.16  | 0.18 | 1.00 | 0 | NA    | NA    | NA | 0 |
| ENSA     | endothelin A-like                                                                     | 1.51 | 0.60  | 0.00 | 0.09 | 1 | 1.12   | 0.16  | 0.29 | 1.00 | 0 | NA    | NA    | NA | 0 |
| PPARD    | peroxisome proliferator-activated receptor delta                                      | 1.51 | 0.59  | 0.00 | 0.10 | 1 | 1.25   | 0.32  | 0.17 | 1.00 | 0 | NA    | NA    | NA | 0 |
| ACOX1    | acyl-CoA oxidase 1, peroxisomal                                                       | 1.70 | 0.77  | 0.00 | 0.07 | 1 | 1.81   | 0.85  | 0.00 | 0.28 | 0 | -1.56 | -0.65 | -1 | 0 |
| IL8      | interleukin 8                                                                         | 2.19 | 1.13  | 0.03 | 0.30 | 0 | 14.53  | 3.86  | 0.00 | 0.02 | 1 | 9.37  | 3.23  | 1  | 0 |
| CXCL3    | chemokine (C-X-C motif) ligand 3                                                      | 1.52 | 0.61  | 0.21 | 0.61 | 0 | 3.81   | 1.93  | 0.00 | 0.00 | 1 | 55.41 | 5.79  | 1  | 0 |
| MAP9K8   | mitogen-activated protein kinase kinase kinase 8                                      | 1.48 | 0.56  | 0.01 | 0.19 | 0 | 3.56   | 1.83  | 0.00 | 0.03 | 1 | 5.82  | 1.27  | 1  | 0 |
| CXCL5    | chemokine (C-X-C motif) ligand 5                                                      | 1.45 | 0.54  | 0.44 | 0.78 | 0 | 5.64   | 2.50  | 0.00 | 0.01 | 1 | 9.22  | 3.20  | 1  | 0 |
| IER3     | intermediate early response 3                                                         | 1.36 | 0.44  | 0.03 | 0.30 | 0 | 1.73   | 0.79  | 0.00 | 0.00 | 1 | 2.35  | 1.23  | 1  | 0 |
| CXCL2    | chemokine (C-X-C motif) ligand 2                                                      | 1.28 | 0.35  | 0.25 | 0.65 | 0 | 6.01   | 2.59  | 0.00 | 0.00 | 1 | 35.50 | 5.15  | 1  | 0 |
| C3       | complement component 3                                                                | 1.27 | 0.34  | 0.34 | 0.72 | 0 | 4.05   | 2.02  | 0.00 | 0.10 | 1 | 7.79  | 2.96  | 1  | 0 |
| CXCL1    | chemokine (C-X-C motif) ligand 1 (melanoma growth stimulating activity, alpha)        | 1.14 | 0.19  | 0.38 | 0.75 | 0 | 7.69   | 2.94  | 0.00 | 0.00 | 1 | 6.75  | 2.75  | 1  | 0 |
| IL8      | interleukin 8                                                                         | 1.14 | 0.19  | 0.36 | 0.74 | 0 | 5.04   | 2.33  | 0.00 | 0.00 | 1 | 5.82  | 2.54  | 1  | 0 |
| CXCL6    | chemokine (C-X-C motif) ligand 6 (granulocyte chemotactic protein 3)                  | 1.12 | 0.17  | 0.70 | 0.91 | 0 | 26.15  | 4.71  | 0.00 | 0.00 | 1 | 6.31  | 2.66  | 1  | 0 |
| NA       | NA                                                                                    | 1.10 | 0.14  | 0.42 | 0.78 | 0 | 2.03   | 1.02  | 0.00 | 0.00 | 1 | 1.99  | 0.99  | 1  | 0 |
| S100A8   | S100 calcium binding protein A8                                                       | NA   | NA    | NA   | NA   | 0 | 1.58   | 0.66  | 0.00 | 0.06 | 1 | NA    | NA    | NA | 0 |
| KLK12    | kallikrein-related peptidase 12                                                       | 5.76 | 2.53  | 0.00 | 0.14 | 0 | 4.18   | 2.06  | 0.00 | 0.15 | 1 | NA    | NA    | NA | 0 |
| RHC6     | Rho family G-proteins                                                                 | 3.38 | 1.76  | 0.01 | 0.15 | 0 | 6.00   | 2.59  | 0.00 | 0.00 | 1 | NA    | NA    | NA | 0 |
| PSORS1C2 | psoriasis susceptibility 1 candidate 2                                                | 2.73 | 1.45  | 0.04 | 0.32 | 0 | 2.44   | 1.29  | 0.00 | 0.16 | 1 | NA    | NA    | NA | 0 |
| CCL20    | chemokine (C-C motif) ligand 20                                                       | 2.34 | 1.23  | 0.01 | 0.15 | 0 | 28.31  | 4.82  | 0.00 | 0.00 | 1 | NA    | NA    | NA | 0 |
| RPS6KA5  | ribosomal protein S6 kinase, 60kDa, polypeptide 5                                     | 2.10 | 1.07  | 0.01 | 0.22 | 0 | 1.61   | 0.69  | 0.00 | 0.10 | 1 | NA    | NA    | NA | 0 |
| TYMP     | tyrosinase phosphatase                                                                | 1.98 | 0.98  | 0.02 | 0.28 | 0 | 1.62   | 0.69  | 0.00 | 0.16 | 1 | 1.21  | 0.27  | 0  | 0 |
| HSPC159  | heat shock-related protein                                                            | 1.94 | 0.96  | 0.01 | 0.18 | 0 | 1.80   | 0.85  | 0.00 | 0.16 | 1 | NA    | NA    | NA | 0 |
| ALDH1A3  | aldehyde dehydrogenase 1 family, member A3                                            | 1.83 | 0.87  | 0.09 | 0.46 | 0 | 1.55   | 0.63  | 0.00 | 0.10 | 1 | NA    | NA    | NA | 0 |
| LCN2     | lysozyme 2                                                                            | 1.61 | 0.69  | 0.04 | 0.32 | 0 | 4.53   | 2.18  | 0.00 | 0.01 | 1 | NA    | NA    | NA | 0 |
| NA       | NA                                                                                    | 1.60 | 0.68  | 0.14 | 0.53 | 0 | 28.29  | 4.66  | 0.00 | 0.00 | 1 | NA    | NA    | NA | 0 |
| PDZK1P1  | PDZK1 interacting protein 1                                                           | 1.58 | 0.66  | 0.03 | 0.29 | 0 | 25.95  | 4.70  | 0.00 | 0.00 | 1 | NA    | NA    | NA | 0 |
| TFRC     | transferrin receptor (beta, CD71)                                                     | 1.55 | 0.64  | 0.01 | 0.17 | 0 | 2.09   | 1.06  | 0.00 | 0.00 | 1 | NA    | NA    | NA | 0 |
| SAT1     | sarcosine/sarcosine N1-acyltransferase 1                                              | 1.50 | 0.59  | 0.04 | 0.35 | 0 | 1.64   | 0.72  | 0.00 | 0.05 | 1 | 1.04  | 0.06  | 0  | 0 |
| S100A9   | S100 calcium binding protein A9                                                       | 1.40 | 0.49  | 0.03 | 0.29 | 0 | 2.15   | 1.10  | 0.00 | 0.04 | 1 | NA    | NA    | NA | 0 |
| NA       | NA                                                                                    | 1.39 | 0.48  | 0.15 | 0.55 | 0 | 13.50  | 3.75  | 0.00 | 0.00 | 1 | NA    | NA    | NA | 0 |
| PI3      | protein phosphatase 3, alpha-related                                                  | 1.39 | 0.47  | 0.01 | 0.18 | 0 | 1.84   | 0.88  | 0.00 | 0.00 | 1 | NA    | NA    | NA | 0 |
| MAFF     | myeloid cell nuclear differentiation factor                                           | 1.36 | 0.44  | 0.03 | 0.30 | 0 | 1.54   | 0.62  | 0.00 | 0.16 | 1 | NA    | NA    | NA | 0 |
| TFRC     | transferrin receptor (beta, CD71)                                                     | 1.34 | 0.42  | 0.14 | 0.53 | 0 | 1.76   | 0.82  | 0.00 | 0.00 | 1 | NA    | NA    | NA | 0 |
| PI3      | protein phosphatase 3, alpha-related                                                  | 1.34 | 0.42  | 0.02 | 0.24 | 0 | 4.48   | 2.16  | 0.00 | 0.00 | 1 | NA    | NA    | NA | 0 |
| NAMPT    | nicotinamide phosphoribosyltransferase                                                | 1.28 | 0.36  | 0.02 | 0.28 | 0 | 1.59   | 0.67  | 0.00 | 0.01 | 1 | 1.23  | 0.30  | 0  | 0 |
| ATGA4    | ATGA4 autophagy related 4 homing (S. cerevisiae)                                      | 1.27 | 0.34  | 0.03 | 0.29 | 0 | 3.44   | 1.78  | 0.00 | 0.00 | 1 | NA    | NA    | NA | 0 |
| CRABP2   | corticosteroid-binding protein 2                                                      | 1.24 | 0.31  | 0.06 | 0.45 | 0 | 1.84   | 0.88  | 0.00 | 0.11 | 1 | NA    | NA    | NA | 0 |
| S100A7   | S100 calcium binding protein A7                                                       | 1.19 | 0.25  | 0.14 | 0.53 | 0 | 2.58   | 1.37  | 0.00 | 0.02 | 1 | NA    | NA    | NA | 0 |
| S100P    | S100 calcium binding protein P                                                        | 1.06 | 0.08  | 0.52 | 0.83 | 0 | 189.38 | 7.57  | 0.00 | 0.00 | 1 | NA    | NA    | NA | 0 |
| TYW1     | tyrosine-yl synthetase protein 1 homing (S. cerevisiae)                               | 0.99 | -0.02 | 0.92 | 0.98 | 0 | 6.35   | 2.67  | 0.00 | 0.12 | 1 | NA    | NA    | NA | 0 |
| SLC25A12 | soluble carrier family 25 (mitochondrial carrier, Anla), member 12                    | 0.97 | -0.04 | 0.78 | 0.94 | 0 | 1.54   | 0.62  | 0.00 | 0.01 | 1 | NA    | NA    | NA | 0 |
| TNFSF10  | tumor necrosis factor (ligand) superfamily, member 10                                 | 0.93 | -0.10 | 0.66 | 0.89 | 0 | 2.14   | 1.10  | 0.00 | 0.08 | 1 | NA    | NA    | NA | 0 |
| NMB      | neuronal membrane protein (ligand) superfamily, member 10                             | 0.81 | -0.30 | 0.50 | 0.82 | 0 | 2.53   | 1.34  | 0.00 | 0.18 | 1 | 0.00  | 0.01  | 0  | 0 |
| PLK1     | polo-like kinase 1                                                                    | 0.62 | -0.69 | 0.03 | 0.29 | 0 | 2.27   | 1.18  | 0.00 | 0.08 | 1 | 1.05  | 0.07  | 0  | 0 |
| TRIO     | triple functional domain (PTPase) interacting                                         | NA   | NA    | NA   | NA   | 0 | 1.18   | 0.24  | 0.38 | 1.00 | 0 | 5.23  | 2.39  | 1  | 0 |
| PTPRR    | protein tyrosine phosphatase, receptor type, R                                        | NA   | NA    | NA   | NA   | 0 | 1.07   | 0.10  | 0.40 | 1.00 | 0 | 2.31  | 1.21  | 1  | 0 |
| ELN      | elastin                                                                               | NA   | NA    | NA   | NA   | 0 | 1.00   | 0.00  | NA   | NA   | 0 | 1.78  | 0.83  | 1  | 0 |
| TRIO     | triple functional domain (PTPase) interacting                                         | NA   | NA    | NA   | NA   | 0 | -1.01  | -0.01 | NA   | NA   | 0 | 5.69  | 2.51  | 1  | 0 |
| BEK1     | brain expressed, 5 kDa-1                                                              | NA   | NA    | NA   | NA   | 0 | 1.05   | 0.07  | NA   | NA   | 0 | 2.15  | 1.11  | 1  | 0 |
| SOD3     | superoxide dismutase 3, extracellular                                                 | NA   | NA    | NA   | NA   | 0 | 1.00   | 0.00  | NA   | NA   | 0 | 1.76  | 0.80  | 1  | 0 |
| CXCL5    | chemokine (C-X-C motif) ligand 5                                                      | 2.25 | 1.17  | 0.07 | 0.40 | 0 | 1.26   | 0.34  | 0.71 | 1.00 | 0 | 21.97 | 4.46  | 1  | 0 |
| POU2F2   | POU class 2 homeobox 2                                                                | 1.59 | 0.67  | 0.01 | 0.20 | 0 | 1.36   | 0.44  | 0.03 | 1.00 | 0 | 4.97  | 2.31  | 1  | 0 |
| SODS1    | superoxide dismutase 1, cytosolic                                                     | 1.56 | 0.64  | 0.01 | 0.21 | 0 | -1.03  | -0.05 | 0.90 | 1.00 | 0 | 4.29  | 2.10  | 1  | 0 |
| PTGS2    | prostaglandin-endoperoxide synthase 2 (prostaglandin G/H synthase and cyclooxygenase) | 1.50 | 0.59  | 0.13 | 0.52 | 0 | 1.67   | 0.74  | 0.01 | 0.79 | 0 | 1.98  | 0.99  | 1  | 0 |
| CLDN1    | claudin 1                                                                             | 1.45 | 0.32  | 0.10 | 0.47 | 0 | -1.04  | -0.06 | 0.47 | 1.00 | 0 | 1.70  | 1.43  | 1  | 0 |
| AMPD3    | adenosine monophosphate deaminase 3                                                   | 1.40 | 0.48  | 0.02 | 0.24 | 0 | 1.30   | 0.38  | 0.04 | 1.00 | 0 | 2.21  | 1.14  | 1  | 0 |
| CORO1B   | coronin, alpha binding protein, 1B                                                    | 1.38 | 0.46  | 0.27 | 0.67 | 0 | -1.81  | -0.86 | 0.07 | 1.00 | 0 | 3.05  | 1.61  | 1  | 0 |
| CTQTNF1  | C1q and tumor necrosis factor related protein 1                                       | 1.34 | 0.42  | 0.20 | 0.60 | 0 | 1.06   | 0.08  | 0.40 | 1.00 | 0 | 2.77  | 1.47  | 1  | 0 |
| IL6      | interleukin 6 (interleukin, beta 2)                                                   | 1.26 | 0.33  | 0.57 | 0.86 | 0 | 1.05   | 0.07  | 0.80 | 1.00 | 0 | 4.54  | 2.18  | 1  | 0 |
| COL7A1   | collagen, type VII, alpha 1                                                           | 1.25 | 0.33  | 0.11 | 0.49 | 0 | -1.21  | -0.28 | 0.20 | 1.00 | 0 | 2.04  | 1.02  | 1  | 0 |
| PIK3CD   | phosphoinositide 3-kinase, catalytic, delta polypeptide                               | 1.24 | 0.32  | 0.10 | 0.49 | 0 | 1.38   | 0.27  | 0.02 | 0.91 | 0 | 1.94  | 0.80  | 1  | 0 |
| TRIP10   | transmembrane protein 10                                                              | 1.24 | 0.31  | 0.43 | 0.73 | 0 | 2.15   | 0.21  | 0.29 | 1.00 | 0 | 1.09  | 0.53  | 1  | 0 |
| TMEM132A | transmembrane protein 132A                                                            | 1.20 | 0.27  | 0.47 | 0.80 | 0 | 1.78   | 0.83  | 0.01 | 0.51 | 0 | 1.60  | 0.68  | 1  | 0 |
| ARF3     | ADP-ribosylation factor 3                                                             | 1.20 | 0.26  | 0.13 | 0.52 | 0 | -1.01  | -0.02 | 0.89 | 1.00 | 0 | 1.56  | 0.64  | 1  | 0 |
| PAPPA    | pregnancy-associated plasma protein A, papalysin 1                                    | 1.18 | 0.24  | 0.35 | 0.73 | 0 | -1.01  | -0.01 | NA   | NA   | 0 | 1.82  | 0.86  | 1  | 0 |
| SVIL     | superoxide                                                                            | 1.17 | 0.23  | 0.62 | 0.88 | 0 | 1.47   | 0.56  | 0.10 | 1.00 | 0 | 2.19  | 1.13  | 1  | 0 |
| RNF24    | ring finger protein 24                                                                | 1.14 | 0.19  | 0.62 | 0.89 | 0 | -1.51  | -0.60 | 0.02 | 0.94 | 0 | 2.05  | 1.04  | 1  | 0 |
| SOD2     | superoxide dismutase 2, mitochondrial                                                 | 1.10 | 0.14  | 0.41 | 0.77 | 0 | -1.00  | 0.80  | 0.02 | 0.45 | 0 |       |       |    |   |

|          |                                                                                                      |    |    |    |    |   |       |       |      |      |      |       |       |   |
|----------|------------------------------------------------------------------------------------------------------|----|----|----|----|---|-------|-------|------|------|------|-------|-------|---|
| PKMYT1   | protein kinase, mitogen-activated tyrosine/tyrosine 1                                                | NA | NA | NA | NA | 0 | 1.13  | 0.18  | 0.24 | 1.00 | 0    | NA    | NA    | 0 |
| GTSE1    | G2 and S-phase checkpoint 1                                                                          | NA | NA | NA | NA | 0 | 1.00  | 0.00  | 0.99 | 1.00 | 0    | NA    | NA    | 0 |
| C15orf39 | chromosome 15 open reading frame 39                                                                  | NA | NA | NA | NA | 0 | 1.16  | 0.21  | 0.16 | 1.00 | 0    | NA    | NA    | 0 |
| TROAP    | tyrosine associated protein domain                                                                   | NA | NA | NA | NA | 0 | 1.19  | 0.25  | 0.13 | 1.00 | 0    | NA    | NA    | 0 |
| RRAD     | Ras-related associated with diabetes                                                                 | NA | NA | NA | NA | 0 | 1.39  | 0.47  | 0.53 | 1.00 | 0    | NA    | NA    | 0 |
| GLDC     | glycine decarboxylase (decarboxylating)                                                              | NA | NA | NA | NA | 0 | 1.22  | 0.29  | 0.13 | 1.00 | 0    | NA    | NA    | 0 |
| TYMP     | tyrosine phosphatase                                                                                 | NA | NA | NA | NA | 0 | 1.50  | 0.61  | 0.18 | 1.00 | 0.68 | 1.01  | 0.01  | 0 |
| CDC25C   | cyclin dependent kinase 2C homolog C (S. pombe)                                                      | NA | NA | NA | NA | 0 | -1.20 | -0.27 | 0.33 | 1.00 | 0    | NA    | NA    | 0 |
| SPEG     | SPEC complex kinase                                                                                  | NA | NA | NA | NA | 0 | -1.25 | -0.32 | 0.07 | 1.00 | 0    | 1.57  | 0.65  | 0 |
| SLC44A4  | solute carrier family 4A, member 4                                                                   | NA | NA | NA | NA | 0 | 1.01  | 0.02  | 0.90 | 1.00 | 0    | NA    | NA    | 0 |
| CCK      | cholecystokinin                                                                                      | NA | NA | NA | NA | 0 | -1.02 | -0.03 | 0.95 | 1.00 | 0    | NA    | NA    | 0 |
| HSD17B1  | hydroxysteroid (17-beta) dehydrogenase 1                                                             | NA | NA | NA | NA | 0 | 1.04  | 0.06  | 0.82 | 1.00 | 0    | NA    | NA    | 0 |
| HIST1H4C | histone cluster 1, H4c                                                                               | NA | NA | NA | NA | 0 | 1.19  | 0.25  | 0.34 | 1.00 | 0    | NA    | NA    | 0 |
| B4GALT6  | UDP-GalNAc4-epimerase/UDP-N-acetylgalactosamine 4-epimerase 6                                        | NA | NA | NA | NA | 0 | -1.18 | -0.21 | 0.62 | 1.00 | 0    | NA    | NA    | 0 |
| GNAL     | guanine nucleotide binding protein (G-protein), alpha activating activity polypeptide, effector type | NA | NA | NA | NA | 0 | -1.29 | -0.37 | 0.85 | 1.00 | 0    | NA    | NA    | 0 |
| KIF14    | kinesin family 14                                                                                    | NA | NA | NA | NA | 0 | -1.09 | -0.12 | 0.48 | 1.00 | 0    | NA    | NA    | 0 |
| LPAR2    | lysophosphatidic acid receptor 2                                                                     | NA | NA | NA | NA | 0 | -1.02 | -0.03 | 0.90 | 1.00 | 0    | NA    | NA    | 0 |
| HoxA7    | homeobox A7                                                                                          | NA | NA | NA | NA | 0 | 1.01  | 0.02  | 0.91 | 1.00 | 0    | NA    | NA    | 0 |
| CDH4     | cadherin 4, type 1 (R-cadherin (velvety))                                                            | NA | NA | NA | NA | 0 | -1.06 | -0.08 | 0.77 | 1.00 | 0    | NA    | NA    | 0 |
| CFHR2    | complement factor H-related 2                                                                        | NA | NA | NA | NA | 0 | -1.02 | -0.03 | 0.84 | 1.00 | 0    | -1.08 | -0.13 | 0 |
| IL12RB2  | interleukin 12 receptor, beta 2                                                                      | NA | NA | NA | NA | 0 | -1.11 | -0.15 | 0.46 | 1.00 | 0    | NA    | NA    | 0 |
| HSF2BP   | heat shock transcription factor 2 binding protein                                                    | NA | NA | NA | NA | 0 | 1.20  | 0.26  | 0.50 | 1.00 | 0    | NA    | NA    | 0 |
| SLC7A11  | solute carrier family 7, subunit, anion and transporter (x-cystine) member 11                        | NA | NA | NA | NA | 0 | -1.55 | -0.64 | 0.19 | 1.00 | 0    | NA    | NA    | 0 |
| CENPI    | centromere protein 1                                                                                 | NA | NA | NA | NA | 0 | -1.24 | -0.31 | 0.26 | 1.00 | 0    | NA    | NA    | 0 |
| ARTN     | artemin                                                                                              | NA | NA | NA | NA | 0 | -1.03 | -0.04 | 0.88 | 1.00 | 0    | NA    | NA    | 0 |
| ARHGAP16 | Rho guanine nucleotide exchange factor (GEF) 16                                                      | NA | NA | NA | NA | 0 | 1.12  | 0.17  | 0.40 | 1.00 | 0    | NA    | NA    | 0 |
| CPVL     | chromatin cluster 1, vello                                                                           | NA | NA | NA | NA | 0 | -1.25 | -0.32 | 0.10 | 1.00 | 0    | NA    | NA    | 0 |
| HIST1H4H | histone cluster 1, H4h                                                                               | NA | NA | NA | NA | 0 | 1.64  | 0.71  | 0.04 | 1.00 | 0    | NA    | NA    | 0 |
| NRG1     | neuregulin 1                                                                                         | NA | NA | NA | NA | 0 | 1.11  | 0.15  | 0.69 | 1.00 | 0    | NA    | NA    | 0 |
| NRG1     | neuregulin 1                                                                                         | NA | NA | NA | NA | 0 | -1.02 | -0.03 | 0.92 | 1.00 | 0    | NA    | NA    | 0 |
| BRCA2    | breast cancer 2, early onset                                                                         | NA | NA | NA | NA | 0 | -1.07 | -0.09 | 0.63 | 1.00 | 0    | NA    | NA    | 0 |
| ATM      | ataxia telangiectasia mutated                                                                        | NA | NA | NA | NA | 0 | -1.78 | -0.83 | 0.21 | 1.00 | 0    | NA    | NA    | 0 |
| HNRNPH3  | heterogeneous nuclear ribonucleoprotein H3 (20S)                                                     | NA | NA | NA | NA | 0 | -1.00 | -0.00 | 1.00 | 1.00 | 0    | 0.00  | 0.01  | 0 |
| PATZ1    | PIC2 (BTR) and AT box containing zinc finger 1                                                       | NA | NA | NA | NA | 0 | 1.01  | 0.01  | 0.93 | 1.00 | 0    | NA    | NA    | 0 |
| ALDH1B1  | aldehyde dehydrogenase 1 family, member B1                                                           | NA | NA | NA | NA | 0 | -1.4  |       |      |      |      |       |       |   |











|          |                                                                                   |      |      |      |      |   |       |       |      |      |   |       |       |   |
|----------|-----------------------------------------------------------------------------------|------|------|------|------|---|-------|-------|------|------|---|-------|-------|---|
| SFC4     | 55s 50s Rho binding protein                                                       | 1.30 | 0.38 | 0.09 | 0.45 | 0 | -1.51 | -0.59 | 0.00 | 0.33 | 0 | -1.30 | -0.38 | 0 |
| ARN12    | structural maintenance of chromosomes 4                                           | 1.30 | 0.38 | 0.11 | 0.48 | 0 | 1.04  | 0.06  | 0.82 | 1.00 | 0 | NA    | NA    | 0 |
| DAAM1    | highly hydrophobic receptor nuclear translocator 2                                | 1.30 | 0.38 | 0.50 | 0.82 | 0 | -1.01 | -0.01 | NA   | NA   | 0 | -1.08 | -0.11 | 0 |
| MFN1     | dephosphorylated activator of morphogenesis 1                                     | 1.30 | 0.38 | 0.05 | 0.37 | 0 | -1.14 | -0.18 | 0.06 | 1.00 | 0 | -1.11 | -0.15 | 0 |
| ITCH     | intrubulin 1                                                                      | 1.30 | 0.38 | 0.09 | 0.46 | 0 | 1.37  | 0.45  | 0.43 | 1.00 | 0 | -1.32 | -0.39 | 0 |
| DOT1L    | histone H2A ubiquitin protein ligase binding domain                               | 1.30 | 0.38 | 0.13 | 0.51 | 0 | 1.24  | 0.31  | 0.34 | 1.00 | 0 | NA    | NA    | 0 |
| PHGDH    | DOT1-like histone H2A methyltransferase (L. cerevisiae)                           | 1.30 | 0.38 | 0.02 | 0.27 | 0 | NA    | NA    | 0.02 | NA   | 0 | NA    | NA    | 0 |
| LGDN     | phosphoglycolate dehydrogenase                                                    | 1.30 | 0.38 | 0.02 | 0.22 | 0 | -1.17 | -0.23 | 0.06 | 1.00 | 0 | 1.07  | 0.09  | 0 |
| ADARB1   | topoisomerase                                                                     | 1.30 | 0.38 | 0.32 | 0.71 | 0 | -1.00 | 0.00  | 0.96 | 1.00 | 0 | -1.05 | -0.07 | 0 |
| USP1     | adenosine deaminase, RNA-specific, B1                                             | 1.30 | 0.37 | 0.08 | 0.43 | 0 | -1.48 | -0.56 | 0.03 | 0.96 | 0 | NA    | NA    | 0 |
| MED28    | ubiquitin specific protease 1                                                     | 1.30 | 0.37 | 0.19 | 0.59 | 0 | -1.18 | -0.24 | 0.25 | 1.00 | 0 | NA    | NA    | 0 |
| AURKA    | mediator complex subunit 28                                                       | 1.30 | 0.37 | 0.05 | 0.36 | 0 | -1.02 | -0.03 | 0.84 | 1.00 | 0 | -1.16 | -0.22 | 0 |
| NA       | serine kinaseA                                                                    | 1.30 | 0.37 | 0.08 | 0.43 | 0 | 1.08  | 0.12  | 0.43 | 1.00 | 0 | NA    | NA    | 0 |
| LAMC2    | NA                                                                                | 1.30 | 0.37 | 0.03 | 0.31 | 0 | 1.02  | 0.03  | 0.76 | 1.00 | 0 | 1.10  | 0.13  | 0 |
| VGLL4    | serpin, gamma 2                                                                   | 1.30 | 0.37 | 0.71 | 0.91 | 0 | 1.01  | 0.01  | 0.97 | 1.00 | 0 | NA    | NA    | 0 |
| KCTD14   | weight belt 4 (Drosophila)                                                        | 1.30 | 0.37 | 0.20 | 0.61 | 0 | -1.03 | -0.04 | 0.87 | 1.00 | 0 | -1.20 | -0.27 | 0 |
| TMSB15A  | cellular chromatin histone/membrane domain containing 14                          | 1.30 | 0.37 | 0.40 | 0.76 | 0 | -1.31 | -0.39 | 0.16 | 1.00 | 0 | -1.22 | -0.28 | 0 |
| NCAPG2   | Thymosin beta 15a                                                                 | 1.29 | 0.37 | 0.41 | 0.77 | 0 | -1.01 | -0.01 | NA   | NA   | 0 | -1.30 | -0.38 | 0 |
| GLS      | non-SMC condensin I complex, subunit G2                                           | 1.29 | 0.37 | 0.03 | 0.30 | 0 | 1.10  | 0.14  | 0.37 | 1.00 | 0 | NA    | NA    | 0 |
| CPNE3    | glyoxalase                                                                        | 1.29 | 0.37 | 0.19 | 0.60 | 0 | 1.27  | 0.34  | 0.61 | 1.00 | 0 | -1.22 | -0.28 | 0 |
| SQRDL    | glyoxalase family 5 glyoxalase histone kinase 2                                   | 1.29 | 0.37 | 0.22 | 0.63 | 0 | -1.01 | -0.01 | NA   | NA   | 0 | -1.16 | -0.21 | 0 |
| HMBS     | gamma B                                                                           | 1.29 | 0.37 | 0.27 | 0.67 | 0 | -1.03 | -0.05 | 0.95 | 1.00 | 0 | -1.33 | -0.41 | 0 |
| CENPF    | cellular genome reduction like (yeast)                                            | 1.29 | 0.37 | 0.02 | 0.25 | 0 | 1.34  | 0.42  | 0.01 | 0.71 | 0 | 1.18  | 0.24  | 0 |
| NA       | hydroxymethylglutathione synthase                                                 | 1.29 | 0.37 | 0.03 | 0.30 | 0 | -1.02 | -0.03 | 0.82 | 1.00 | 0 | NA    | NA    | 0 |
| ARH1     | serine/threonine protein S. 3024000Aa (protein)                                   | 1.29 | 0.37 | 0.24 | 0.65 | 0 | -1.16 | -0.21 | 0.61 | 1.00 | 0 | NA    | NA    | 0 |
| ATRN     | NA                                                                                | 1.29 | 0.37 | 0.09 | 0.46 | 0 | -1.14 | -0.19 | 0.31 | 1.00 | 0 | NA    | NA    | 0 |
| RG55     | adenine homology, ubiquitin-conjugating enzyme E3 binding protein, 1 (Drosophila) | 1.29 | 0.37 | 0.02 | 0.26 | 0 | 1.21  | 0.28  | 0.38 | 1.00 | 0 | -1.13 | -0.39 | 0 |
| GSPT1    | ATRN                                                                              | 1.29 | 0.37 | 0.21 | 0.62 | 0 | -1.22 | -0.29 | 0.19 | 1.00 | 0 | -1.37 | -0.46 | 0 |
| NA       | regulator of G protein signaling 9                                                | 1.29 | 0.37 | 0.33 | 0.72 | 0 | -1.01 | -0.01 | NA   | NA   | 0 | 0.00  | -0.01 | 0 |
| MTG1     | G1 to S phase transition 1                                                        | 1.29 | 0.37 | 0.16 | 0.56 | 0 | 1.03  | 0.05  | 0.88 | 1.00 | 0 | -1.06 | -0.10 | 0 |
| ATP2B1   | NA                                                                                | 1.29 | 0.37 | 0.33 | 0.72 | 0 | NA    | NA    | NA   | NA   | 0 | NA    | NA    | 0 |
| TNFRSF25 | histone kinase (Drosophila)                                                       | 1.29 | 0.37 | 0.26 | 0.68 | 0 | 1.0   |       |      |      |   |       |       |   |



























































|              |                                                                  |      |       |      |      |    |       |       |      |      |    |       |       |    |
|--------------|------------------------------------------------------------------|------|-------|------|------|----|-------|-------|------|------|----|-------|-------|----|
| NA           | NA                                                               | 0.33 | -1.62 | 0.00 | 0.01 | -1 | -1.12 | -0.16 | 0.65 | 1.00 | 0  | NA    | NA    | 0  |
| ZNF323       | zinc finger protein 323                                          | 0.32 | -1.62 | 0.00 | 0.01 | -1 | 1.19  | 0.26  | 0.27 | 1.00 | 0  | NA    | NA    | 0  |
| GPR37        | G protein-coupled receptor 37 (amblyotain receptor type B-like)  | 0.32 | -1.63 | 0.00 | 0.01 | -1 | -1.03 | -0.05 | 0.80 | 1.00 | 0  | NA    | NA    | 0  |
| NHLH2        | helix-loop-helix 2                                               | 0.32 | -1.65 | 0.00 | 0.05 | -1 | -1.33 | -0.41 | 0.14 | 1.00 | 0  | NA    | NA    | 0  |
| NA           | NA                                                               | 0.32 | -1.67 | 0.00 | 0.04 | -1 | NA    | NA    | NA   | NA   | 0  | NA    | NA    | 0  |
| FAM70A       | family with sequence similarity 70, member A                     | 0.31 | -1.68 | 0.00 | 0.06 | -1 | -1.02 | -0.03 | NA   | NA   | 0  | NA    | NA    | 0  |
| EPHB6        | EPH receptor B6                                                  | 0.31 | -1.70 | 0.00 | 0.00 | -1 | -1.18 | -0.24 | 0.12 | 1.00 | 0  | NA    | NA    | 0  |
| ITGAM        | integrin, alpha M (complement component 3 receptor 3 subunit)    | 0.31 | -1.70 | 0.00 | 0.10 | -1 | -1.01 | -0.01 | NA   | NA   | 0  | NA    | NA    | 0  |
| ITGBL1       | integrin, beta-like 1 (with EGF-like repeat domains)             | 0.31 | -1.71 | 0.00 | 0.07 | -1 | -1.04 | -0.06 | NA   | NA   | 0  | -2.13 | -1.09 | 0  |
| LOC100289632 | hypothetical protein LOC100289632                                | 0.30 | -1.72 | 0.00 | 0.03 | -1 | NA    | NA    | NA   | NA   | 0  | NA    | NA    | 0  |
| PYDC1        | pyridoxal phosphate decarboxylase 1                              | 0.30 | -1.75 | 0.00 | 0.04 | -1 | NA    | NA    | NA   | NA   | 0  | NA    | NA    | 0  |
| NA           | NA                                                               | 0.29 | -1.77 | 0.00 | 0.01 | -1 | -1.12 | -0.17 | 0.59 | 1.00 | 0  | NA    | NA    | 0  |
| NCRNA00086   | non-protein coding RNA 86                                        | 0.28 | -1.82 | 0.00 | 0.01 | -1 | NA    | NA    | NA   | NA   | 0  | NA    | NA    | 0  |
| NA           | NA                                                               | 0.28 | -1.85 | 0.00 | 0.00 | -1 | -1.18 | -0.24 | 0.45 | 1.00 | 0  | NA    | NA    | 0  |
| ROR1         | receptor tyrosine kinase-like orphan receptor 1                  | 0.27 | -1.89 | 0.00 | 0.06 | -1 | NA    | NA    | NA   | NA   | 0  | NA    | NA    | 0  |
| TNNT2        | troponin T type 2 (cardiac)                                      | 0.27 | -1.90 | 0.00 | 0.02 | -1 | -1.01 | -0.02 | NA   | NA   | 0  | NA    | NA    | 0  |
| NA           | NA                                                               | 0.26 | -1.95 | 0.00 | 0.02 | -1 | NA    | NA    | NA   | NA   | 0  | NA    | NA    | 0  |
| CRNN         | crinoidin                                                        | 0.26 | -1.95 | 0.00 | 0.00 | -1 | -1.00 | -0.01 | NA   | NA   | 0  | NA    | NA    | 0  |
| MYB          | Myeloblastosis viral oncogene homolog (avian)                    | 0.26 | -1.97 | 0.00 | 0.05 | -1 | 1.00  | 0.00  | NA   | NA   | 0  | NA    | NA    | 0  |
| PDE4C        | phosphodiesterase 4C, cAMP-specific                              | 0.25 | -1.99 | 0.00 | 0.06 | -1 | NA    | NA    | NA   | NA   | 0  | NA    | NA    | 0  |
| BHLHE22      | basic helix-loop-helix family, member 22                         | 0.24 | -2.06 | 0.00 | 0.10 | -1 | NA    | NA    | NA   | NA   | 0  | NA    | NA    | 0  |
| NA           | NA                                                               | 0.24 | -2.07 | 0.00 | 0.09 | -1 | NA    | NA    | NA   | NA   | 0  | NA    | NA    | 0  |
| NA           | NA                                                               | 0.21 | -2.26 | 0.00 | 0.01 | -1 | NA    | NA    | NA   | NA   | 0  | NA    | NA    | 0  |
| STMN2        | stathmin-like 2                                                  | 0.20 | -2.31 | 0.00 | 0.04 | -1 | -1.01 | -0.01 | NA   | NA   | 0  | NA    | NA    | 0  |
| NA           | NA                                                               | 0.19 | -2.36 | 0.00 | 0.01 | -1 | -1.04 | -0.06 | 0.85 | 1.00 | 0  | NA    | NA    | 0  |
| NA           | NA                                                               | 0.19 | -2.36 | 0.00 | 0.01 | -1 | NA    | NA    | NA   | NA   | 0  | NA    | NA    | 0  |
| BTC          | betacellulin                                                     | 0.19 | -2.37 | 0.00 | 0.07 | -1 | NA    | NA    | NA   | NA   | 0  | NA    | NA    | 0  |
| ERP27        | endoplasmic reticulum protein 27                                 | 0.19 | -2.41 | 0.00 | 0.00 | -1 | NA    | NA    | NA   | NA   | 0  | NA    | NA    | 0  |
| STMN2        | stathmin-like 2                                                  | 0.18 | -2.47 | 0.00 | 0.02 | -1 | -1.00 | -0.01 | NA   | NA   | 0  | NA    | NA    | 0  |
| GPX2         | glutathione peroxidase 2 (gastric/mucosal)                       | 0.18 | -2.49 | 0.00 | 0.09 | -1 | 1.07  | 0.10  | 0.32 | 1.00 | 0  | NA    | NA    | 0  |
| SLC46A2      | solute carrier family 46, member 2                               | 0.17 | -2.59 | 0.00 | 0.01 | -1 | NA    | NA    | NA   | NA   | 0  | NA    | NA    | 0  |
| IGFL2        | IGF-like family member 2                                         | 0.17 | -2.59 | 0.00 | 0.01 | -1 | NA    | NA    | NA   | NA   | 0  | NA    | NA    | 0  |
| NA           | NA                                                               | 0.16 | -2.64 | 0.00 | 0.01 | -1 | NA    | NA    | NA   | NA   | 0  | NA    | NA    | 0  |
| ALDH3A1      | aldehyde dehydrogenase 3 family, member A1                       | 0.15 | -2.69 | 0.00 | 0.00 | -1 | -1.02 | -0.02 | NA   | NA   | 0  | NA    | NA    | 0  |
| MYC11        | myc target 1                                                     | 0.15 | -2.71 | 0.00 | 0.01 | -1 | NA    | NA    | NA   | NA   | 0  | NA    | NA    | 0  |
| SLC47A2      | solute carrier family 47, member 2                               | 0.15 | -2.74 | 0.00 | 0.00 | -1 | NA    | NA    | NA   | NA   | 0  | NA    | NA    | 0  |
| CXCL14       | chemokine (C-X-C motif) ligand 14                                | 0.14 | -2.86 | 0.00 | 0.01 | -1 | NA    | NA    | NA   | NA   | 0  | NA    | NA    | 0  |
| KRT17        | keratin 17                                                       | 0.14 | -2.87 | 0.00 | 0.01 | -1 | NA    | NA    | NA   | NA   | 0  | NA    | NA    | 0  |
| AKR1B10      | alkali-alkali reductase family 1, member B10 (alkali reductases) | 0.13 | -2.90 | 0.00 | 0.01 | -1 | 1.20  | 0.27  | 0.48 | 1.00 | 0  | NA    | NA    | 0  |
| NA           | NA                                                               | 0.13 | -2.92 | 0.00 | 0.02 | -1 | NA    | NA    | NA   | NA   | 0  | NA    | NA    | 0  |
| FAIM2        | Fas apoptosis inhibitory molecule 2                              | 0.13 | -2.93 | 0.00 | 0.02 | -1 | -1.01 | -0.01 | NA   | NA   | 0  | NA    | NA    | 0  |
| BTBD16       | beta-tubulin domain-containing 16                                | 0.13 | -2.99 | 0.00 | 0.03 | -1 | NA    | NA    | NA   | NA   | 0  | NA    | NA    | 0  |
| CXCL14       | chemokine (C-X-C motif) ligand 14                                | 0.11 | -3.19 | 0.00 | 0.02 | -1 | -2.03 | -1.02 | 0.24 | 1.00 | 0  | NA    | NA    | 0  |
| SPINK7       | serine peptidase inhibitor, Kazal type 7 (putative)              | 0.10 | -3.26 | 0.00 | 0.07 | -1 | NA    | NA    | NA   | NA   | 0  | NA    | NA    | 0  |
| MTTP         | microtubule triplet-tubule transfer protein                      | 0.10 | -3.30 | 0.00 | 0.04 | -1 | -1.01 | -0.01 | NA   | NA   | 0  | NA    | NA    | 0  |
| APOB         | apolipoprotein B (including ApoB) antigen                        | 0.09 | -3.40 | 0.00 | 0.01 | -1 | -1.01 | -0.01 | NA   | NA   | 0  | NA    | NA    | 0  |
| ADH1B        | alcohol dehydrogenase 1B (class 1), beta polypeptide             | 0.09 | -3.42 | 0.00 | 0.10 | -1 | -1.01 | -0.02 | NA   | NA   | 0  | NA    | NA    | 0  |
| TCRH         | T-cell receptor                                                  | 0.09 | -3.51 | 0.00 | 0.01 | -1 | -1.01 | -0.01 | NA   | NA   | 0  | NA    | NA    | 0  |
| AOP5         | apolipoprotein 5                                                 | 0.09 | -3.54 | 0.00 | 0.01 | -1 | -1.00 | -0.01 | NA   | NA   | 0  | NA    | NA    | 0  |
| DAPL1        | death-associated protein-like 1                                  | 0.08 | -3.64 | 0.00 | 0.00 | -1 | NA    | NA    | NA   | NA   | 0  | NA    | NA    | 0  |
| OSR2         | osimergestrol-related 2 (Ornithine)                              | 0.35 | -1.51 | 0.00 | 0.07 | -1 | -1.13 | -0.18 | 0.65 | 1.00 | 0  | -1.56 | -0.64 | -1 |
| KRT10        | keratin 10                                                       | 0.61 | -0.70 | 0.00 | 0.07 | -1 | -1.53 | -0.61 | 0.00 | 0.10 | -1 | -1.02 | -0.03 | 0  |
| CYP4B1       | cytochrome P450, family 4, subfamily B, polypeptide 1            | 0.20 | -2.29 | 0.00 | 0.10 | -1 | -4.56 | -2.19 | 0.00 | 0.07 | -1 | NA    | NA    | 0  |

FCH, fold change; FDR, false discovery rate; lg, log
